# Supplementary material for: Sex bias in social deficits, neural circuits and nutrient demand in Cttnbp2 autism models
Source: PubMed Central journal article supplement — Brain. 2022 Nov 17;146(6):2612–26. doi: 10.1093/brain/awac429 (PMC10232293; doi:10.1093/brain/awac429), 2022-11-17
Supplement: awac429_supplementary_data.pdf [file awac429_supplementary_data.pdf]

# Sex bias in social deficits, neural circuits and nutrient demand in *Cttnbp2* autism models

Tzu-Li Yen, Tzyy-Nan Huang, Ming-Hui Lin, Tsan-Ting Hsu, Ming-Hsuan Lu, Pu-Yun-Shih, Jacob Ellegood, Jason Lerch and Yi-Ping Hsueh\*

\* Correspondence and requests for materials should be addressed to Yi-Ping Hsueh ([yph@gate.sinica.edu.tw](mailto:yph@gate.sinica.edu.tw))

**The PDF file includes Supplementary figures and legends, Supplementary methods and Supplementary Tables:**

**Supplementary Fig. 1.** *Cttnbp2* M120I mutation impairs the social behaviors of male mice but not females in the adult stage (related to Fig. 1).

**Supplementary Fig. 2.** Behaviors of *Cttnbp2*<sup>+/-</sup>, *Cttnbp2*<sup>-/-</sup> and *Cttnbp2* M120I mice in an open field and light/dark box (related to Fig. 1).

**Supplementary Fig. 3.** The brain regions of female M120I mice differentially respond to social stimulation (related to Fig. 2).

**Supplementary Fig. 4.** Brain regions do not show differential neuronal activation between genotypes upon social stimulation (related to Fig. 2).

**Supplementary Fig. 5.** Summary of AAV expression and injection sites (related to Fig. 3).

**Supplementary Fig. 6.** Chemogenetic manipulation does not alter mouse behaviors in an open field (related to Fig. 3).

**Supplementary Fig. 7.** Bioinformatic analysis of synaptic proteomes (related to Fig. 4).

**Supplementary Fig. 8.** BCAA supplementation does not alter mouse behaviors in an open field or body weight (related to Fig. 5).

**Supplementary Fig. 9.** Zinc supplementation does not alter mouse behaviors in an open field or elevated plus maze (related to Fig. 6).

**Supplementary Fig. 10.** Uncropped images of all immunoblotting experiments presented in this report (related to Fig. 4 and 5).

**Supplementary Methods.**

**Supplementary Table 1** Quantification results from structural MRI (sMRI) of male and female *Cttnbp2*<sup>+/M120I</sup> mice (related to Fig. 2).

**Supplementary Table 2** List of brain regions subjected to C-FOS staining and the *P* values for the comparisons among four groups (related to Fig. 2).

**Supplementary Table 3** Ratios of mean C-FOS+ cell density across 31 brain regions (related to Fig. 2A).

**Supplementary Table 4** Differentially expressed proteins in ILA synaptic proteomes between male M120I mutant and male wild-type mice (related to Fig. 4).

**Supplementary Table 5** Differentially expressed proteins in ILA synaptic proteomes between female M120I mutant and female wild-type mice (related to Fig. 4).

**Supplementary Table 6** Disease association of female differentially expressed proteins in ILA synaptic proteomes (related to Fig. 4).

**Supplementary Table 7** Statistical methods and results (related to Fig. 1, 3, 4, 5 and 6).

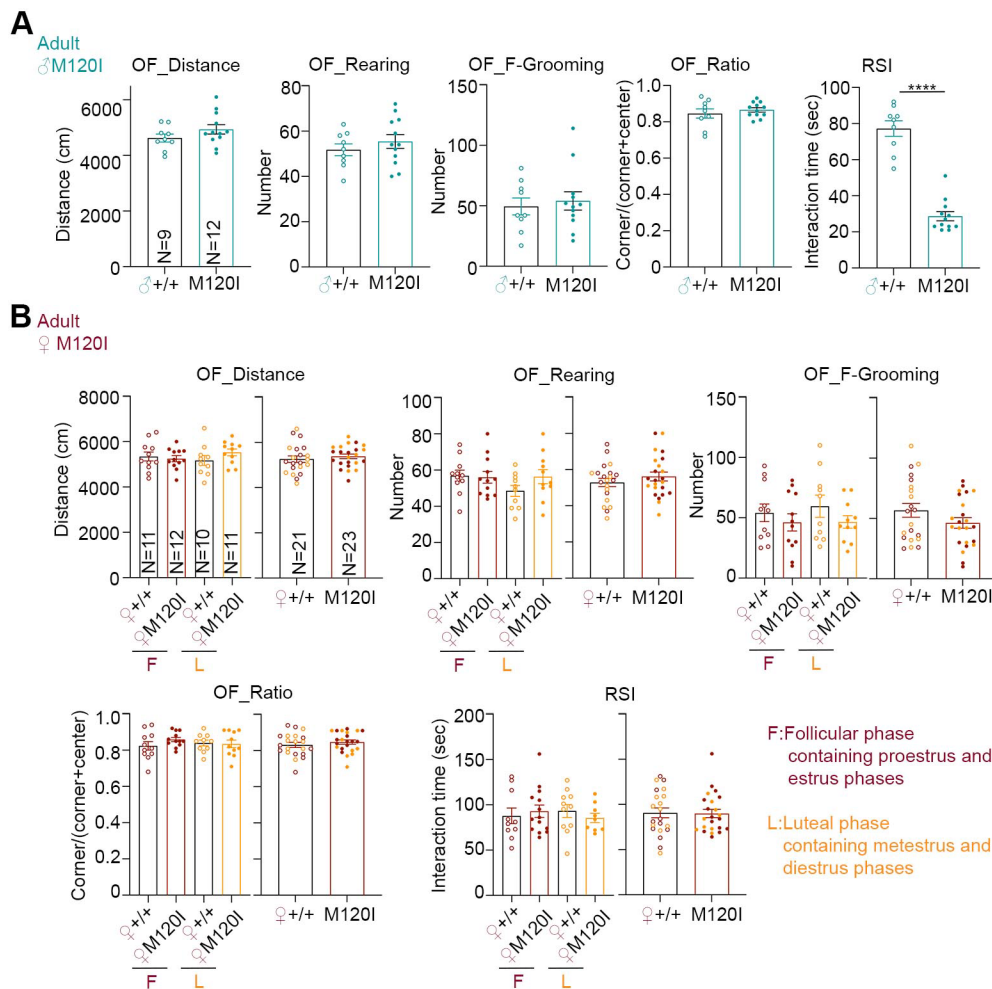

**Supplementary Fig. 1. *Cttnbp2* M120I mutation impairs the social behaviors of male mice but not females in the adult stage (related to Fig. 1).** (A) Adult male M120I mice of line #12 behave normally in an open field (OF), according to the total travel distance, rearing event number, grooming event number, and the ratio of the time spent in corners to the sum of time spent in the corners and the central area. However, M120I mutation does reduce the social behaviors of adult males in reciprocal social interaction (RSI). (B) In adult female mice, M120I mutation does not influence social behaviors or other behaviors in an open field, regardless of estrus cycle. Mouse estrus cycle has been separated into the follicular phase (proestrus and estrus phases) and the luteal phase (metestrus and diestrus phases). The sample sizes ( $N$ , i.e., numbers of mice) are indicated. Data are presented as means  $\pm$  SEM, and the data points of individual mice are shown. \*\*\*\*,  $P < 0.0001$ . Two-tailed unpaired  $t$  test.

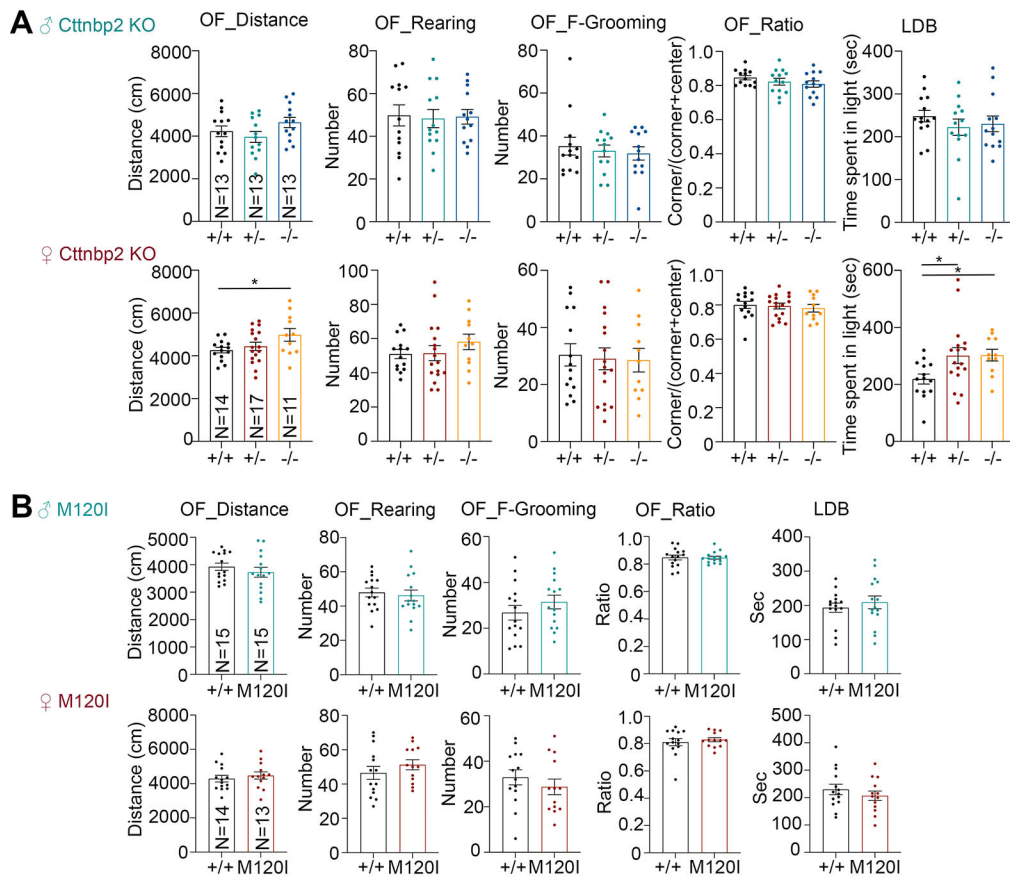

**Supplementary Fig. 2. Behaviors of *Ctnnbp2*<sup>+/-</sup>, *Ctnnbp2*<sup>-/-</sup> and M120I mice in an open field and light/dark box (related to Fig. 1).** All experiments in this figure were conducted on juvenile mice younger than P42. **(A)** The behaviors of *Ctnnbp2*<sup>+/-</sup> and *Ctnnbp2*<sup>-/-</sup> mice in an open field (OF) and light-dark box (LDB). Upper: male; lower: female. Male mutant mice behaved normally in these two tests. Female mutant mice exhibited higher locomotor activity and anxiolytic behaviors. **(B)** The M120I mutant mice behave normally compared to their wild-type littermates, independently of sex. The sample sizes (*N*, i.e., numbers of mice) are indicated only in the left-most panels. Data are presented as means ± SEM, and the data points of individual mice are shown. \*  $P < 0.05$ ; \*\*,  $P < 0.01$ . One-way ANOVA was used in **(A)**. Two-tailed unpaired *t* test was used in **(B)**.

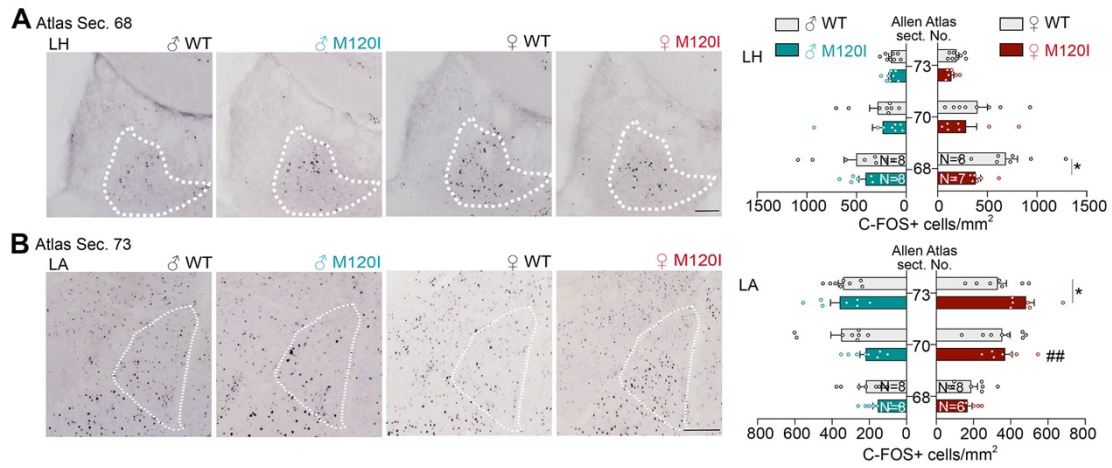

**Supplementary Fig. 3. The brain regions of female M120I mice differentially respond to social stimulation (related to Fig. 2).** Two hours after reciprocal social stimulations at P42 (**Fig. 1A**), C-FOS staining was performed to identify differentially activated brain regions of male and female *Cttnbp2* M120I mice. Only the lateral habenula (LH) and lateral amygdala (LA) were altered in female mutant mice, as shown in (**A**) and (**B**), respectively. Note that neuronal activity was reduced in the LH but increased in the LA of female mutant mice. The numbers (*N*) of mice examined are indicated. Data are presented as means  $\pm$  SEM and individual data points are shown. \*,  $P < 0.05$ , the comparison between female WT and M120I mice; ##,  $P < 0.01$ , the comparison between male and female mutant mice. Two-tailed unpaired *t* test. Scale bar: (**A**) 100  $\mu$ m; (**B**) 250  $\mu$ m.

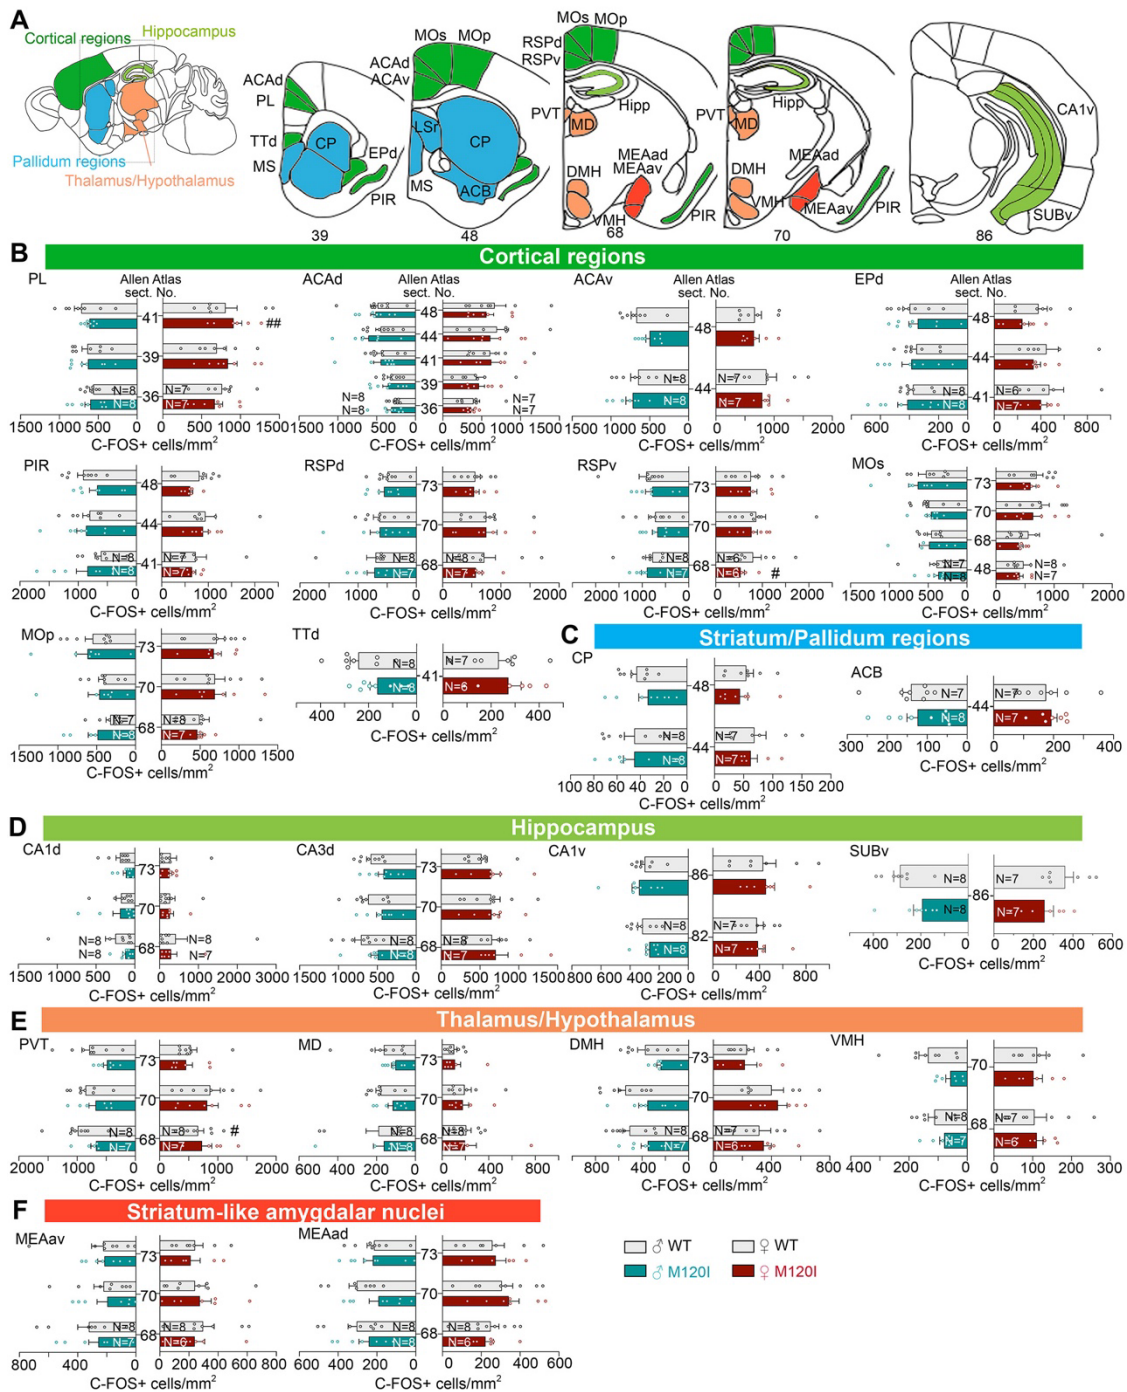

**Supplementary Fig. 4. Brain regions do not show differential neuronal activation between genotypes upon social stimulation (related to Fig. 2).** In addition to the brain regions shown in Figures 2 and S2, the results of C-FOS staining in the remaining brain regions assessed are summarized here. Full names of the brain regions are listed in **Supplementary Table 2**. (A) Schematic diagrams of brain sections. Different brain regions are highlighted with different colors. The corresponding section numbers based on the Allen Brain Atlas are indicated. (B)-(F) C-FOS-positive cell densities. Both male and female WT and *Cttnbp2* M120I mutant mice were analyzed. Each set of results presents data from male and female mice in the left and right panels, respectively. (B) Cortical region. (C) Striatum and pallidum regions. (D) Hippocampus. (E) Thalamus

and hypothalamus. (F) Striatum-like amygdalar nuclei. The numbers ( $N$ ) of mice examined are indicated. In general, 6-8 mouse brains were used for each group. Data are presented as means  $\pm$  SEM and individual data points are shown.. #,  $P < 0.05$ ; ##,  $P < 0.01$ ; comparison between male and female mice with the same genotype. Two-tailed unpaired  $t$  test.

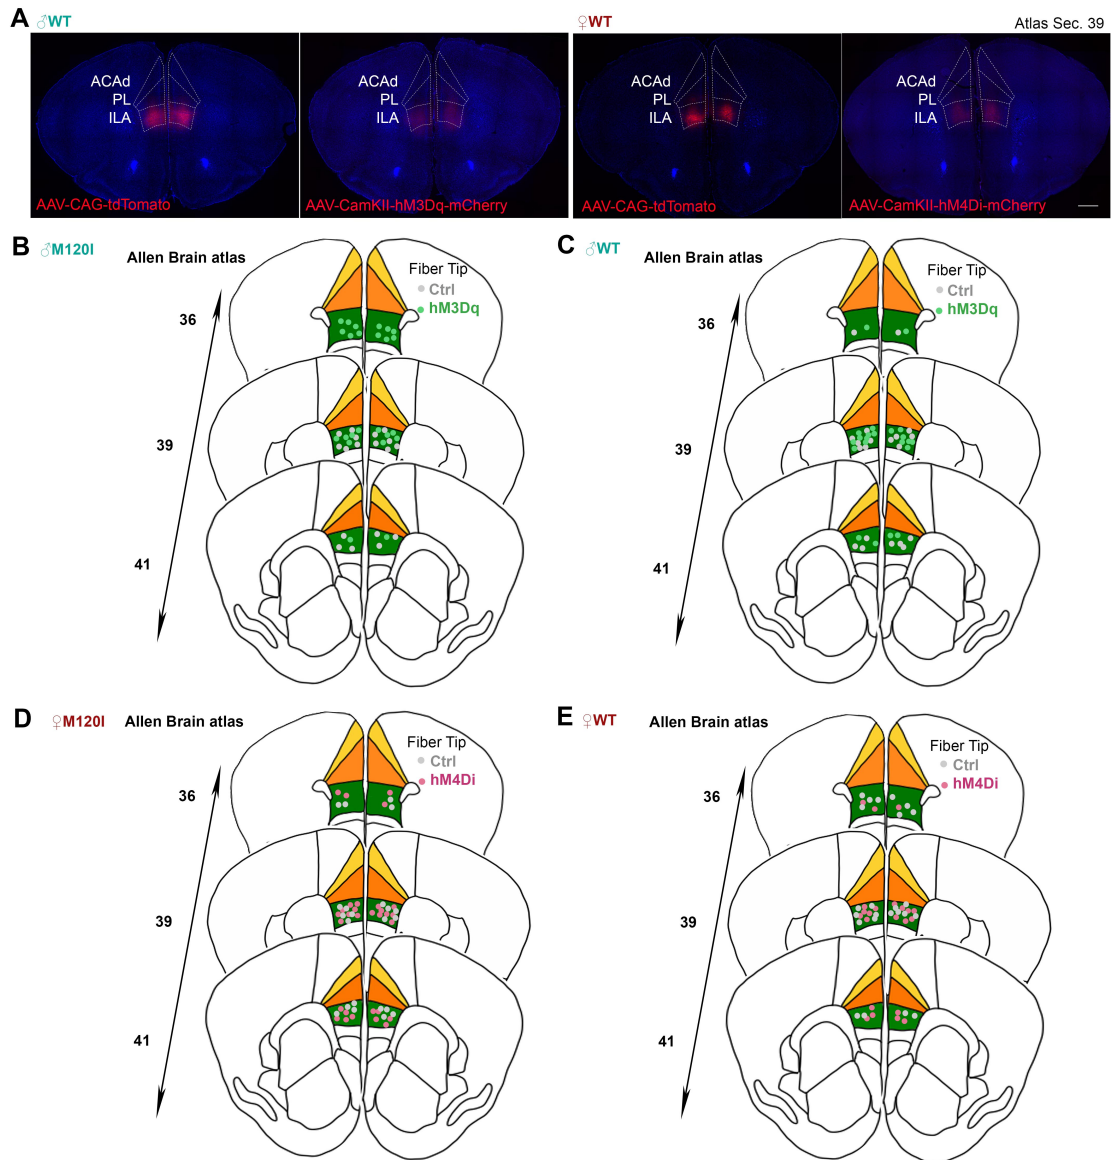

**Supplementary Fig. 5. Summary of AAV expression and injection sites (related to Fig. 3).** (A) Representative images of AAV expression at the injection site of the ILA. In addition to the ILA, the PL and ACAd regions are also indicated. Immunofluorescence signals of tdTomato and mCherry were used to monitor AAV expression. (B)-(E) AAV injection sites. (B) Male M120I mice were injected with AAV-CaMKII-hM3Dq-mCherry or AAV-CAG-tdTomato as a control (related to Fig. 3C). (C) Male WT mice injected with AAV-CaMKII-hM3Dq-mCherry or AAV-CAG-tdTomato as a control (related to Fig. 3D). (D) Female M120I mice injected with AAV-CaMKII-hM4Di-mCherry or AAV-CAG-tdTomato as a control (related to Fig. 3E). (E) Female WT mice injected with AAV-CaMKII-hM4Di-mCherry or AAV-CAG-tdTomato as a control (related to Fig. 3F). The Allen's Brain Atlas was used to identify brain regions, with corresponding section numbers indicated. Scale bar: 500  $\mu$ m.



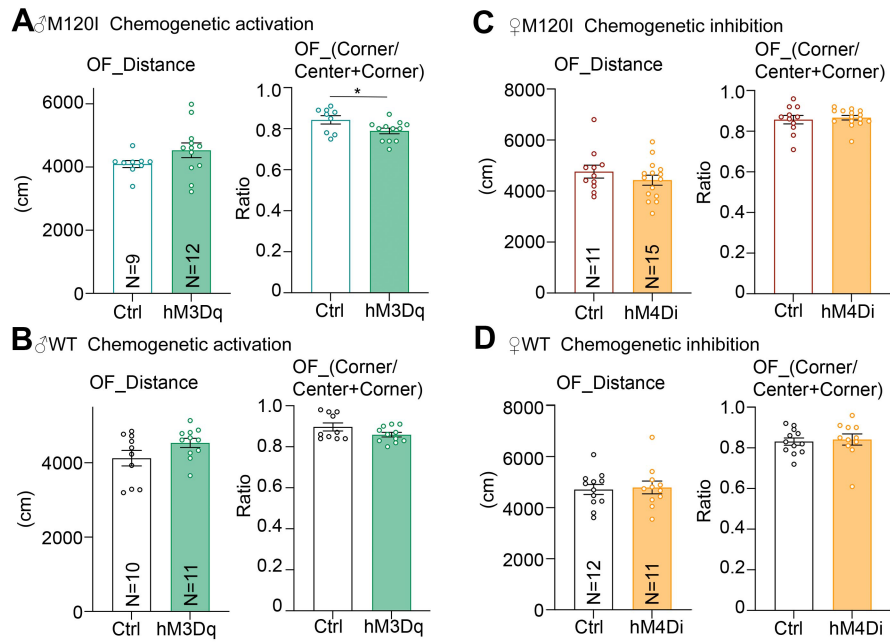

**Supplementary Fig. 6. Chemogenetic manipulation does not alter mouse behaviors in an open field (related to Fig. 3).** Before the social behavioral assays shown in **Figure 3**, all mice were analyzed in an open field test to determine the effect of surgery and expression of hM3Dq or hM4D1 on locomotor activity and anxiety. The results of open field are summarized here. The data of social interaction are shown in **Fig. 3C-3F**. Data are presented as means  $\pm$  SEM and individual data points are shown. The numbers (*N*) of examined mice are indicated. \*,  $P < 0.05$ ; \*\*,  $P < 0.01$ ; \*\*\*,  $P < 0.001$ ; \*\*\*\*,  $P < 0.0001$ . Two-tailed unpaired *t* tests.

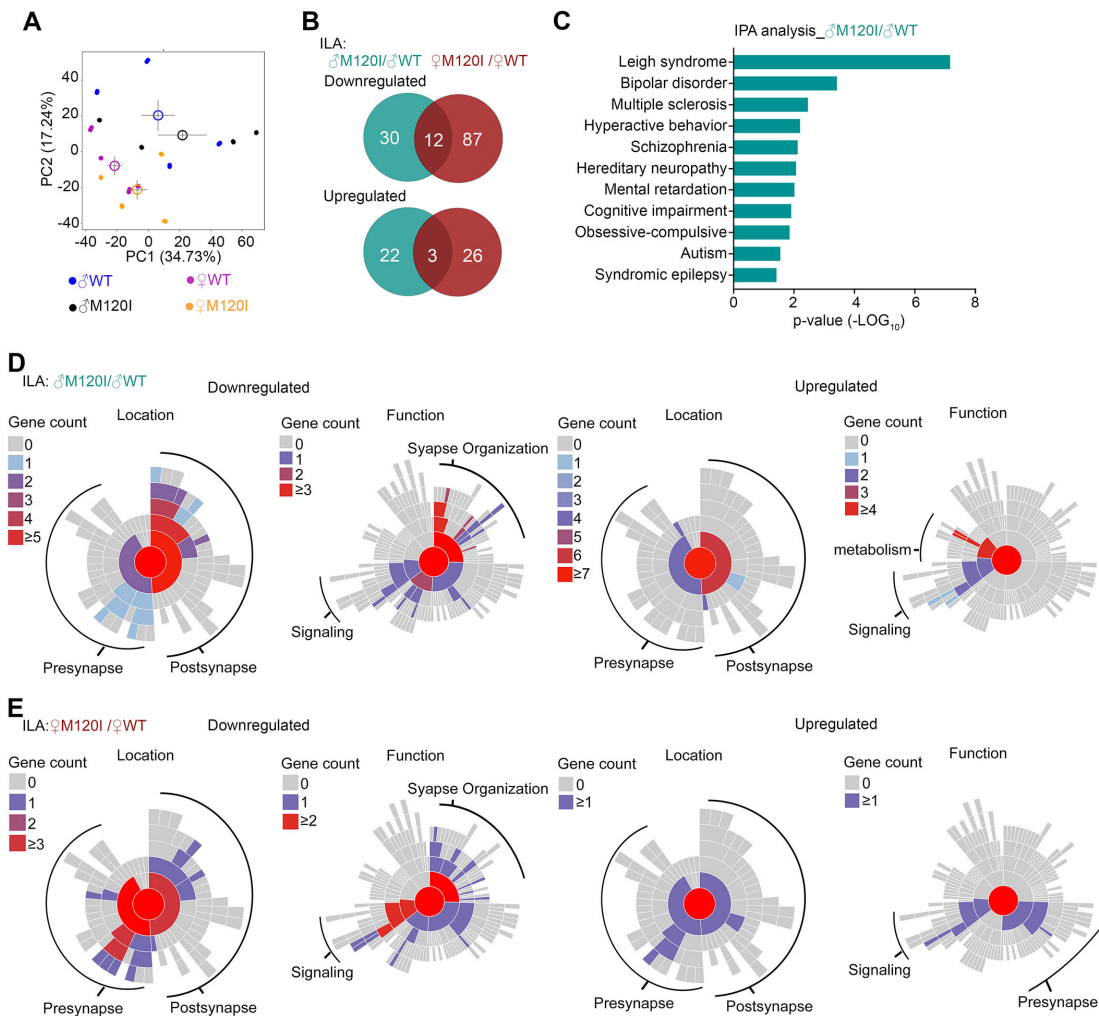

**Supplementary Fig. 7. Bioinformatic analysis of synaptic proteomes (related to Fig. 4).** (A) Principal component analysis of synaptic proteomes. Principal components 1 (PC1) and 2 (PC2) account for 34.73% and 17.24% of the data variability, respectively. (B) Venn diagram of differentially expressed proteins (DEPs) identified from the comparisons of ♂M120I vs. ♂WT and ♀M120I vs. ♀WT. The numbers of DEPs for each group are indicated. (C) The P values for disease association, as determined by IPA (related to Fig. 4c). (D)-(E) Differentially expressed synaptic proteomes of ILA, as analyzed by Syngo (<https://www.syngoportal.org>). (D) The DEPs of male mutant mice vs. male wild-type mice. (E) The DEPs of female mutant mice vs. female wild-type mice. The up- and down-regulated DEPs are shown separately. These analyses are based on both the location (pre- and post-synapses) and the function of DEPs. The gene count for each analysis is also indicated in the upper left corner.

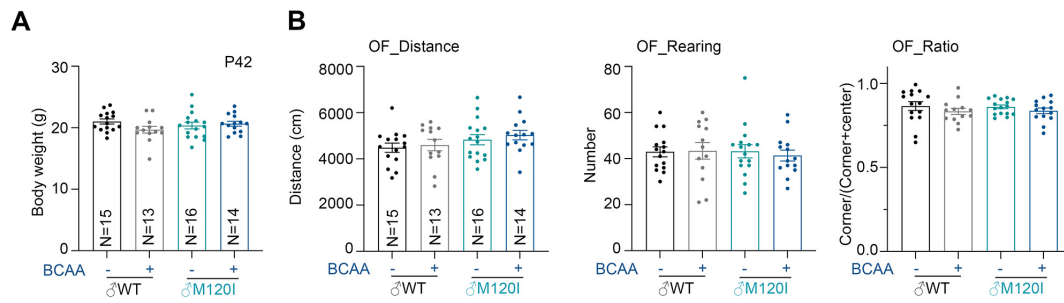

**Supplementary Fig. 8. BCAA supplementation does not alter body weight or mouse behaviors in an open field (related to Fig. 5).** (A) Body weight of mice after BCAA supplementation for 7 days at P42. (B) Mouse behaviors in an open field (OF). The same mice were used in Figure 5 and here. Total travel distance, numbers of rearing events, and the ratio of the time spent at corners to the sum of time spent at corners and center in an OF were measured 4 days after BCAA supplementation. None of the behavioral features in the open field were altered. Sample sizes ( $N$ , number of mice) are indicated. Data are presented as means  $\pm$  SEM, and the results of individual mice are shown.

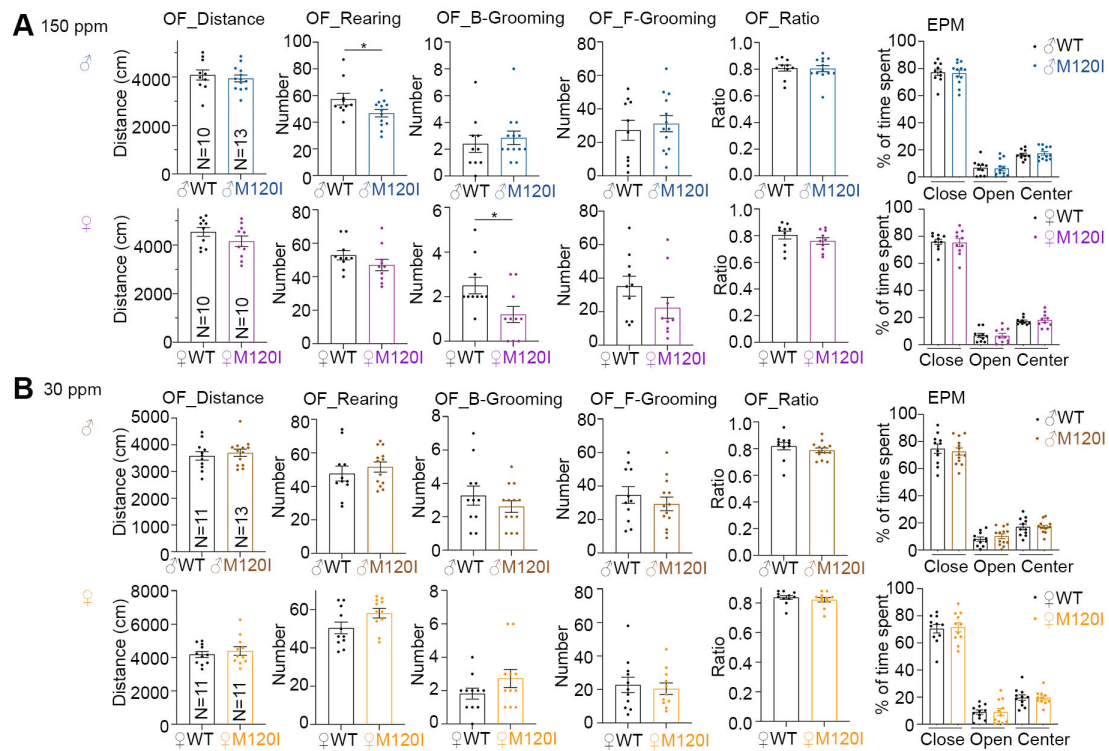

**Supplementary Fig. 9. Zinc supplementation does not alter mouse behaviors in an open field or elevated plus maze (related to Fig. 6).**

The same sets of mice with different intakes of zinc used in **Fig. 6** were also analyzed in an open field (OF) at P30 and in an elevated plus maze (EPM) test at P32, as indicated in **Fig. 6A**. The results are summarized here. **(A)** Mice fed 150 ppm zinc diet. **(B)** Mice fed 30 ppm zinc diet. Total travel distance, number of rearing events, number of face (F) and body (B) grooming events, and the ratio of the time spent at corners to the sum of time spent at corners and center in an OF were measured. The percentages of time spent in the closed arm, open arm and center area of the elevated plus maze are summarized in the right panel. None of the behavioral features in the open field or elevated plus maze were altered. The sample size (*N*, number of mice) is shown in the respective columns of the panel on the left. Data are presented as means  $\pm$  SEM, and the results of individual mice are shown.

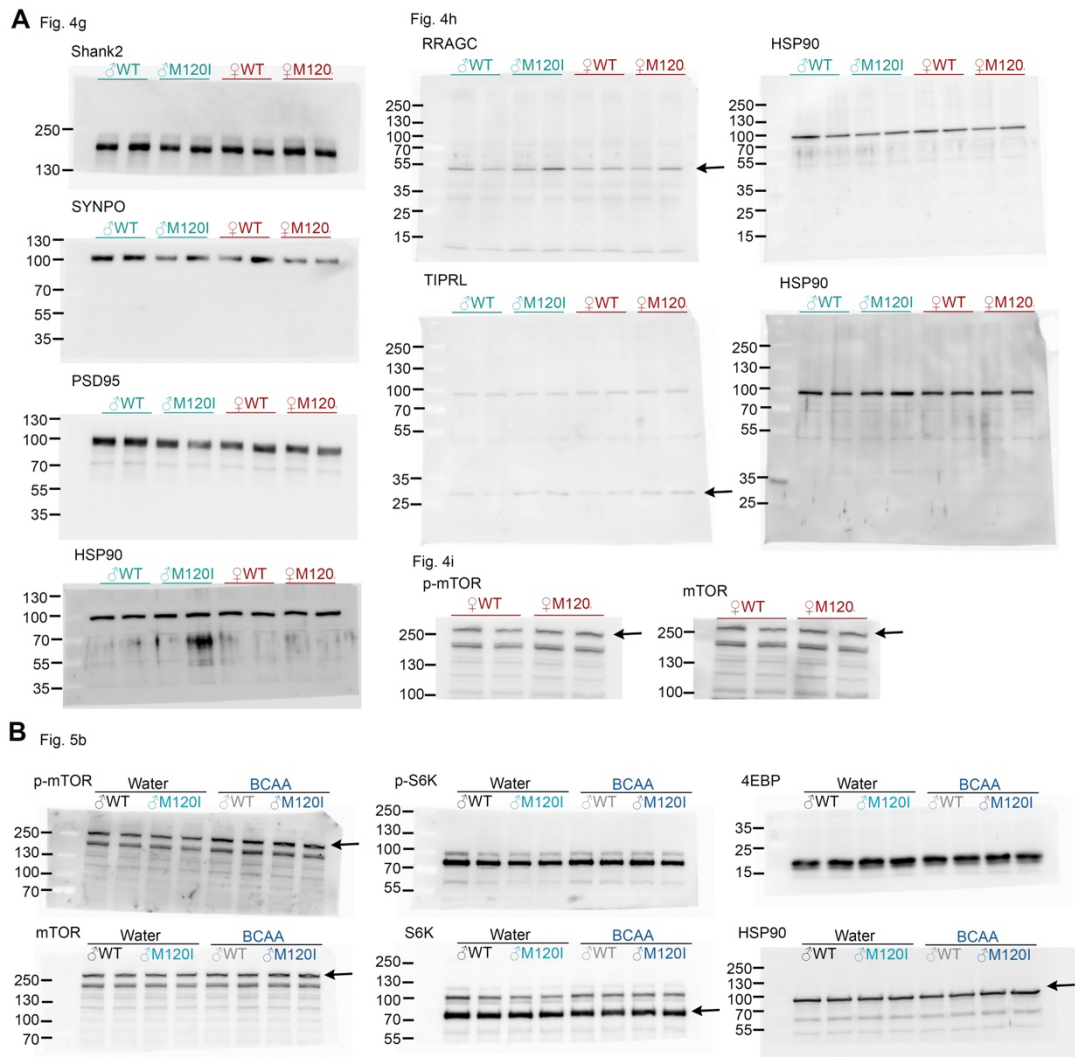

**Supplementary Fig. 10. Uncropped images of all immunoblotting experiments presented in this report (related to Fig. 4 and 5). (A) Original blots of Fig. 4. (B) Original blots of Fig. 5.**

## **Supplementary Methods**

### **Open-field (OF) test**

Mice were individually placed into the center of a transparent plastic box (40 x 40 x 32.5 cm) and allowed to freely explore the box for 10 min. Mouse behaviors in the box were video recorded from above and analyzed using the Smart Video Tracking System (Panlab, Barcelona, Spain). Total traveling distance (representing horizontal locomotion activity), number of rearing events (representing exploratory and vertical locomotion activity), number of grooming events and the ratio of time spent in the corners to the total time spent in the corners plus the central area (representing the degree of anxiety) were measured.

### **Light-dark box (LDB) test**

A black box (19 x 39 x 45 cm) was inverted and put into the open field box to divide the space into two equal compartments. A small opening at the bottom of the black box (5 x 10 cm) allowed mice to freely explore the light and dark areas. Behaviors in the light-dark box were videotaped from above for 10 min. The time spent in the light box was analyzed using the Smart Video Tracking System (Panlab, Barcelona, Spain).

### **Elevated plus maze (EPM)**

The apparatus raised to a height of 45.5 cm above the laboratory floor consisted of two open arms (30 cm x 5 cm), and two closed arms (30 cm x 5 cm) enclosed by 14 cm-high walls extending from a central platform (5 cm x 5 cm). An individual mouse was placed on the central area facing the open arm and allowed to freely explore the entire maze for 10 min. Movement was videotaped from above and analyzed using the Smart Video Tracking System (Panlab, Barcelona, Spain). The percentage of time spent in the open arms, closed arms, and central area were determined. A higher percentage in the closed arm indicates a higher level of anxiety.

### **Three-chamber (3C) test**

A transparent plastic box (17.5 x 41.5 x 22 cm) was divided into three equal compartments by means of two sliding doors. An identical cylindrical wire cage (16 cm in height, 9.5 cm in diameter) was placed individually inside each of the two side chambers. Directly before conducting the test, the test mice were placed into a new nesting cage. The entire test consisted of three 10-min sessions—i.e. habituation,

sociability, and novelty preference tests—with 2 min intervals between each session. Compartments and wire cages were cleaned with 75% EtOH and water after each task. During intervals, the test mice were placed back in the nesting cage. In the first habituation session, both cylindrical wire cages were empty. In the second sociability test, a plastic toy of a cartoon character of similar size to the adult mice was used as an inanimate object (Ob), which was randomly placed in the wire cage of either the left or right chamber. An unfamiliar mouse of the same sex and of similar size and age (S1) was placed in the other wire cage in the opposite chamber. In the last social novelty session, the inanimate object was replaced by another unfamiliar mouse (S2). The movement and sniffing behaviors of mice were recorded by videotaping from above. Sniffing toward the cylindrical wire cages was quantified manually without knowing the genotype of the mice. The total sniffing time was used to represent social interaction. The values of  $(T_{S1}-T_{Ob})$  and  $(T_{S2}-T_{S1})$  were determined as preference indices of sociability and social novelty, respectively.

## **Reciprocal social interaction (RSI) test**

The lid of the home cage of test mice was removed to habituate mice for at least 5 min. WT C57BL/6J unfamiliar mice of the same sex and similar age and body weight were then introduced into the home cage of the test mice. Interactions were videotaped from above for 5 min. Time spent in social interactions, including sniffing, following and allogrooming, was recorded and analyzed blind to the genotype.

## **Magnetic resonance imaging**

Mice were anesthetized and intracardially perfused with 10 ml of 0.1 M PBS containing 10 U/ml heparin, followed by 10 ml of 4% paraformaldehyde (PFA). The entire brain and skull were post-fixed in 4% PFA at 4 °C overnight and transferred to 0.1 M PBS and 0.02% sodium azide for at least one month before MRI scanning <sup>1</sup>. The solutions mentioned above all contained 2 mM ProHance. The anatomical MRI scans were performed using a T2-weighted, three-dimensional fast spin-echo sequence, with a cylindrical acquisition of k-space, and with a repetition time (TR) of 350 ms, echo time (TE) of 12 ms per echo for six echoes, a field of view of  $20 \times 20 \times 25 \text{ mm}^3$ , and a matrix size =  $504 \times 504 \times 630$  generating an image of 0.040 mm isotropic voxels. Total imaging time was  $\sim 14 \text{ h}^2$ . For the volume measurements, deformations encompassing the entire brain of each individual mouse were calculated in a common consensus space using deformation-based morphometry (DBM), which includes iterative linear and nonlinear

registrations. The Jacobian determinants of the deformation fields were then calculated as measures of volume for each voxel. Volume changes were additionally calculated by warping a pre-existing classified MRI atlas onto the population atlas, which allowed for the volume of 182 segmented structures<sup>3-7</sup>. These measurements could then be examined on a voxel-wise basis to localize the differences found within regions or across the brain. Multiple comparisons were accounted for using the false discovery rate (FDR).<sup>8</sup>

## **Immunofluorescence staining**

Immunofluorescence staining of mouse brains was performed as described previously<sup>9</sup>. Mice were anesthetized and perfused with PBS followed by 4% paraformaldehyde in PBS. The mouse brains were cryopreserved in 30% sucrose solution at 4 °C and embedded in OCT. We collected 50- $\mu$ m-thick coronal sections using a cryostat microtome (CM1900, Leica). After washing with Tris-buffered saline (TBS), the brain sections were permeabilized with 0.1% Triton X-100 in TBS and blocked with 3% horse serum and 2% bovine serum albumin (BSA) in TBS at room temperature for 2 h. Primary antibodies were then added for overnight incubation at 4 °C. After washing, brain sections were incubated with Alexa flour-488 and/or Alexa flour-555-conjugated secondary antibodies. Cell nuclei were counterstained with DAPI. Images were collected using an epifluorescence microscope (AxioImager-Z1; Carl Zeiss) or a confocal microscope (LSM700, Carl Zeiss) driven by Zen blue or Zen 2009, respectively.

## **Liquid chromatography-tandem mass spectrometry (LC-MS-MS) analysis**

### **Preparation of the synaptosomal fraction of mouse brains**

Synaptosomal fractions were prepared as described previously<sup>10, 11</sup> with some minor modifications. In brief, four biological repeats were used for each group. Given that the ILA is a very small brain region, the tissue samples of three mice were pooled as one replicate. The brains corresponding to section number 39-41 of Allen Brain Atlas were dissected and sliced into 300- $\mu$ m-thick sections in ice-cold PBS using a vibratome (DTK-1000, Dosaka, Japan). The ILA regions were collected from each brain slice under a dissecting microscope and kept at -80 °C before fractionation. The brain tissues were homogenized using a tissue Dounce homogenizer with a loose pestle in 300  $\mu$ l sucrose buffer [50 mM Tris-Cl pH7.4, 320 mM sucrose, 2 mM DTT, 2  $\mu$ m/ml leupeptin,



2  $\mu\text{m}/\text{ml}$  pepstatin-A, 2  $\mu\text{m}/\text{ml}$  aprotinin, 2 mM PMSF]. This total homogenate was centrifuged at 800 x g for 10 min at 4 °C. The supernatant was collected and centrifuged again at 9200 x g for 15 min to collect the pellet as a crude synaptosomal fraction. Equal protein amounts of fractions were subjected to trypsinization and NanoLC-nanoESI-MS/MS analysis using an EASY-nLC 1200 system linked to a Thermo Orbitrap Fusion Lumos mass spectrometer (Thermo-Fisher Scientific, Bremen, Germany) equipped with a Nanospray Flex ion source (Thermo-Fisher Scientific, Bremen, Germany). Detailed methods are reported in our recent publications<sup>10,11</sup>.

### **Label-free quantification**

Our proteomic data were searched against the Swiss-Prot *Mus musculus* database (17,049 entries total) using the Mascot search engine (v.2.6.2; Matrix Science, Boston, MA, USA) through Proteome Discoverer (v 2.2.0.388; Thermo-Fisher Scientific, Waltham, MA, USA). The search criteria were trypsin digestion, carbamidomethyl (C) for the fixed modification, oxidation (M) and acetylation (protein N-terminal) for the variable modifications, two missed cleavages, and 10 ppm of mass accuracy for the parent ion and 0.6 Da for the fragment ions. The false discovery rate (FDR) was calculated using the Proteome Discoverer Percolator function, and identifications with an FDR > 1% were rejected. For label-free quantification, precursor ion areas were extracted using the Minora Feature Detector node in Proteome Discoverer 2.2 with a 2-ppm mass precision and 2 min retention time-shift (to align the LC/MS-MS peaks mapping the isotope pattern and retention time). The ratios for each peptide were normalized against the total identified peptides and were used for protein-level quantification.

### **Analysis of functional protein networks and gene ontology**

After quantifying the LC-MS-MS data, peptide signals of reliable quality and an adjusted *p*-value < 0.05 were used to identify differentially expressed proteins (**Supplementary Tables 4-5**). STRING analysis (version 11.0, <https://string-db.org/>) was employed to identify functional protein networks. Lines between nodes indicate that the interactions are based on experimental or STRING database evidence. The thickness of the lines indicates the confidence associated with the interaction. Different colors indicate associations with various gene ontology (GO), reactome (MMU) or annotated keyword (KW) pathways. Some nodes have multiple colors, indicating their involvement in multiple pathways.

## References

1. de Guzman AE, Wong MD, Gleave JA, Nieman BJ. Variations in post-perfusion immersion fixation and storage alter MRI measurements of mouse brain morphometry. *NeuroImage*. 2016;142:687-95.
2. Spencer Noakes TL, Henkelman RM, Nieman BJ. Partitioning k-space for cylindrical three-dimensional rapid acquisition with relaxation enhancement imaging in the mouse brain. *NMR in biomedicine*. 2017;30(11).
3. Dorr AE, Lerch JP, Spring S, Kabani N, Henkelman RM. High resolution three-dimensional brain atlas using an average magnetic resonance image of 40 adult C57Bl/6J mice. *Neuroimage*. 2008;42(1):60-9.
4. Steadman PE, Ellegood J, Szulc KU, Turnbull DH, Joyner AL, Henkelman RM, et al. Genetic effects on cerebellar structure across mouse models of autism using a magnetic resonance imaging atlas. *Autism research : official journal of the International Society for Autism Research*. 2014;7(1):124-37.
5. Ullmann JF, Watson C, Janke AL, Kurniawan ND, Reutens DC. A segmentation protocol and MRI atlas of the C57BL/6J mouse neocortex. *Neuroimage*. 2013;78:196-203.
6. Beera KG, Li YQ, Dazai J, Stewart J, Egan S, Ahmed M, et al. Altered brain morphology after focal radiation reveals impact of off-target effects: implications for white matter development and neurogenesis. *Neuro-oncology*. 2018;20(6):788-98.
7. Qiu LR, Fernandes DJ, Szulc-Lerch KU, Dazai J, Nieman BJ, Turnbull DH, et al. Mouse MRI shows brain areas relatively larger in males emerge before those larger in females. *Nature communications*. 2018;9(1):2615.
8. Genovese CR, Lazar NA, Nichols T. Thresholding of statistical maps in functional neuroimaging using the false discovery rate. *Neuroimage*. 2002;15(4):870-8.
9. Huang TN, Yen TL, Qiu LR, Chuang HC, Lerch JP, Hsueh YP. Haploinsufficiency of autism causative gene *Tbr1* impairs olfactory discrimination and neuronal activation of the olfactory system in mice. *Molecular autism*. 2019;10:5.
10. Shih PY, Hsieh BY, Lin MH, Huang TN, Tsai CY, Pong WL, et al. CTTNBP2 Controls Synaptic Expression of Zinc-Related Autism-Associated Proteins and Regulates Synapse Formation and Autism-like Behaviors. *Cell reports*. 2020;31(9):107700.
11. Shih YT, Huang TN, Hu HT, Yen TL, Hsueh YP. Vcp Overexpression and Leucine Supplementation Increase Protein Synthesis and Improve Fear Memory and Social Interaction of *Nf1* Mutant Mice. *Cell reports*. 2020;31(13):107835.

**Supplementary Table 1 Quantification results from structural MRI (sMRI) of male and female *Cttnbp2* M120I mice (related to Fig. 2).**

| Absolute Volumes                                   | M120I |      | WT    |      | %Diff | Effect | P-value | FDR  |
|----------------------------------------------------|-------|------|-------|------|-------|--------|---------|------|
|                                                    | Mean  | SD   | Mean  | SD   |       |        |         |      |
| Amygdala                                           | 9.36  | 0.34 | 9.32  | 0.42 | 0.47  | 0.10   | 0.72    | 0.96 |
| Anterior_commissure_pars_anterior                  | 0.88  | 0.03 | 0.86  | 0.04 | 1.50  | 0.31   | 0.28    | 0.96 |
| Anterior_commissure_pars_posterior                 | 0.41  | 0.03 | 0.40  | 0.03 | 0.66  | 0.09   | 0.77    | 0.96 |
| Basal_forebrain                                    | 5.36  | 0.18 | 5.37  | 0.20 | -0.33 | -0.09  | 0.76    | 0.96 |
| Bed_nucleus_of_stria_terminalis                    | 1.34  | 0.09 | 1.31  | 0.11 | 2.05  | 0.24   | 0.42    | 0.96 |
| Cerebellar_peduncle_inferior                       | 0.80  | 0.05 | 0.81  | 0.05 | -0.93 | -0.14  | 0.63    | 0.96 |
| Cerebellar_peduncle_middle                         | 1.19  | 0.05 | 1.19  | 0.06 | -0.23 | -0.05  | 0.87    | 0.96 |
| Cerebellar_peduncle_superior                       | 1.01  | 0.06 | 1.01  | 0.07 | 0.10  | 0.01   | 0.96    | 0.98 |
| Cerebral_aqueduct                                  | 0.51  | 0.08 | 0.51  | 0.06 | -0.55 | -0.05  | 0.90    | 0.96 |
| Cerebral_peduncle                                  | 1.99  | 0.08 | 2.00  | 0.08 | -0.64 | -0.16  | 0.62    | 0.96 |
| Colliculus_inferior                                | 5.48  | 0.28 | 5.46  | 0.33 | 0.22  | 0.04   | 0.90    | 0.96 |
| Colliculus_superior                                | 8.78  | 0.56 | 8.73  | 0.51 | 0.58  | 0.10   | 0.77    | 0.96 |
| Corpus_callosum                                    | 11.12 | 0.55 | 11.10 | 0.72 | 0.24  | 0.04   | 0.90    | 0.96 |
| Corticospinal_tract_pyramids                       | 1.38  | 0.23 | 1.52  | 0.28 | -9.47 | -0.52  | 0.08    | 0.96 |
| Cuneate_nucleus                                    | 0.24  | 0.04 | 0.24  | 0.04 | -1.64 | -0.09  | 0.76    | 0.96 |
| Facial_nerve_cranial_nerve_7                       | 0.22  | 0.02 | 0.22  | 0.02 | 1.15  | 0.12   | 0.68    | 0.96 |
| Fasciculus_retroflexus                             | 0.24  | 0.01 | 0.23  | 0.01 | 0.82  | 0.14   | 0.66    | 0.96 |
| Fimbria                                            | 3.30  | 0.26 | 3.22  | 0.29 | 2.58  | 0.29   | 0.35    | 0.96 |
| Fornix                                             | 0.64  | 0.03 | 0.63  | 0.03 | 0.98  | 0.19   | 0.51    | 0.96 |
| Fourth_ventricle                                   | 0.89  | 0.10 | 0.90  | 0.14 | -2.01 | -0.13  | 0.63    | 0.96 |
| Fundus_of_striatum                                 | 0.16  | 0.01 | 0.16  | 0.01 | -0.02 | 0.00   | 0.99    | 0.99 |
| Globus_pallidus                                    | 3.41  | 0.26 | 3.34  | 0.19 | 2.36  | 0.41   | 0.29    | 0.96 |
| Habenular_commissure                               | 0.04  | 0.01 | 0.04  | 0.01 | 1.41  | 0.05   | 0.85    | 0.96 |
| Hypothalamus                                       | 10.60 | 0.34 | 10.56 | 0.37 | 0.37  | 0.11   | 0.73    | 0.96 |
| Inferior_olivary_complex                           | 0.34  | 0.05 | 0.36  | 0.05 | -5.91 | -0.43  | 0.18    | 0.96 |
| Internal_capsule                                   | 3.24  | 0.15 | 3.15  | 0.19 | 2.77  | 0.47   | 0.11    | 0.96 |
| Interpeduncular_nucleus                            | 0.26  | 0.02 | 0.26  | 0.02 | 1.33  | 0.20   | 0.51    | 0.96 |
| Lateral_olfactory_tract                            | 1.35  | 0.05 | 1.34  | 0.06 | 0.67  | 0.14   | 0.62    | 0.96 |
| Lateral_septum                                     | 3.17  | 0.21 | 3.10  | 0.20 | 1.97  | 0.31   | 0.34    | 0.96 |
| Lateral_ventricle                                  | 4.27  | 0.90 | 4.14  | 0.64 | 2.92  | 0.19   | 0.63    | 0.96 |
| Mammillary_bodies                                  | 0.45  | 0.03 | 0.47  | 0.04 | -2.92 | -0.35  | 0.23    | 0.96 |
| Mammillothalamic_tract                             | 0.24  | 0.01 | 0.24  | 0.01 | 0.45  | 0.08   | 0.80    | 0.96 |
| Medial_lemniscus_medial<br>Longitudinal_fasciculus | 2.31  | 0.25 | 2.45  | 0.27 | -5.59 | -0.50  | 0.11    | 0.96 |
| Medial_septum                                      | 1.22  | 0.05 | 1.22  | 0.05 | 0.16  | 0.04   | 0.89    | 0.96 |
| Medulla                                            | 24.74 | 2.69 | 25.24 | 3.12 | -1.95 | -0.16  | 0.60    | 0.96 |
| Midbrain                                           | 13.80 | 0.83 | 13.72 | 0.81 | 0.56  | 0.10   | 0.77    | 0.96 |
| Nucleus_accumbens                                  | 4.20  | 0.21 | 4.13  | 0.21 | 1.76  | 0.35   | 0.28    | 0.96 |
| Olfactory_peduncle                                 | 2.23  | 0.09 | 2.22  | 0.11 | 0.53  | 0.10   | 0.72    | 0.96 |
| Olfactory_tubercle                                 | 3.26  | 0.31 | 3.35  | 0.36 | -2.78 | -0.26  | 0.39    | 0.96 |
| Optic_tract                                        | 1.49  | 0.12 | 1.49  | 0.08 | 0.38  | 0.07   | 0.86    | 0.96 |
| Periaqueductal_grey                                | 3.96  | 0.24 | 3.93  | 0.24 | 0.87  | 0.14   | 0.66    | 0.96 |
| Pons                                               | 16.84 | 0.55 | 16.82 | 0.57 | 0.13  | 0.04   | 0.90    | 0.96 |
| Pontine_nucleus                                    | 0.74  | 0.06 | 0.74  | 0.05 | 1.01  | 0.15   | 0.66    | 0.96 |
| Posterior_commissure                               | 0.14  | 0.01 | 0.14  | 0.01 | 1.03  | 0.16   | 0.58    | 0.96 |
| Pre_para_subiculum                                 | 2.27  | 0.16 | 2.26  | 0.09 | 0.52  | 0.13   | 0.78    | 0.96 |
| Stria_medullaris                                   | 0.70  | 0.04 | 0.69  | 0.05 | 1.25  | 0.18   | 0.55    | 0.96 |
| Stria_terminalis                                   | 0.95  | 0.05 | 0.94  | 0.06 | 0.99  | 0.15   | 0.59    | 0.96 |
| Striatum                                           | 20.51 | 0.74 | 20.06 | 1.16 | 2.21  | 0.38   | 0.16    | 0.96 |
| Subependymale_zone_rhinocele                       | 0.04  | 0.00 | 0.04  | 0.00 | 3.75  | 0.59   | 0.06    | 0.96 |

|                                                   |       |      |       |      |        |       |      |      |
|---------------------------------------------------|-------|------|-------|------|--------|-------|------|------|
| Superior_olivary_complex                          | 0.78  | 0.06 | 0.79  | 0.06 | -0.30  | -0.04 | 0.90 | 0.96 |
| Thalamus                                          | 17.79 | 0.94 | 17.46 | 0.96 | 1.93   | 0.35  | 0.27 | 0.96 |
| Third_ventricle                                   | 1.33  | 0.11 | 1.32  | 0.11 | 0.77   | 0.09  | 0.78 | 0.96 |
| Ventral_tegmental_decussation                     | 0.13  | 0.01 | 0.13  | 0.01 | -0.29  | -0.04 | 0.90 | 0.96 |
| Lobules_1_2_lingula_and<br>Central_lobule_ventral | 1.56  | 0.14 | 1.56  | 0.15 | 0.17   | 0.02  | 0.95 | 0.98 |
| Lobule_3_central_lobule_dorsal                    | 1.88  | 0.14 | 1.87  | 0.20 | 0.48   | 0.05  | 0.87 | 0.96 |
| Lobules_4_5_culmen_ventral<br>And_dorsal          | 4.11  | 0.29 | 4.03  | 0.40 | 1.93   | 0.20  | 0.49 | 0.96 |
| Lobule_6_declive                                  | 2.67  | 0.15 | 2.92  | 0.36 | -8.71  | -0.72 | 0.01 | 0.96 |
| Lobule_7_tuber_or_folium                          | 1.05  | 0.15 | 1.17  | 0.22 | -10.31 | -0.54 | 0.05 | 0.96 |
| Lobule_8_pyramis                                  | 1.54  | 0.15 | 1.60  | 0.26 | -3.90  | -0.24 | 0.35 | 0.96 |
| Lobule_9_uvula                                    | 2.76  | 0.18 | 2.79  | 0.39 | -1.07  | -0.08 | 0.76 | 0.96 |
| Lobule_10_nodus                                   | 1.24  | 0.12 | 1.21  | 0.23 | 3.06   | 0.16  | 0.54 | 0.96 |
| Anterior_lobule_lobules_4_5                       | 1.57  | 0.09 | 1.54  | 0.13 | 1.93   | 0.23  | 0.41 | 0.96 |
| Simple_lobule_lobule_6                            | 4.92  | 0.16 | 4.84  | 0.25 | 1.69   | 0.33  | 0.22 | 0.96 |
| Crus_1_ansiform_lobule_lobule_6                   | 4.26  | 0.18 | 4.30  | 0.28 | -0.83  | -0.13 | 0.64 | 0.96 |
| Crus_2_ansiform_lobule_lobule_7                   | 3.84  | 0.18 | 3.97  | 0.20 | -3.05  | -0.61 | 0.05 | 0.96 |
| Paramedian_lobule_lobule_7                        | 4.09  | 0.34 | 4.21  | 0.33 | -2.68  | -0.34 | 0.29 | 0.96 |
| Copula_pyramis_lobule_8                           | 2.35  | 0.17 | 2.38  | 0.16 | -1.30  | -0.19 | 0.56 | 0.96 |
| Flocculus_FL                                      | 1.00  | 0.07 | 0.97  | 0.08 | 2.69   | 0.32  | 0.28 | 0.96 |
| Paraflocculus_PFL                                 | 3.43  | 0.41 | 3.39  | 0.40 | 1.04   | 0.09  | 0.78 | 0.96 |
| Trunk_of_arbor_vita                               | 3.78  | 0.16 | 3.71  | 0.28 | 2.06   | 0.27  | 0.30 | 0.96 |
| Lobule_1_2_white_matter                           | 0.06  | 0.01 | 0.06  | 0.01 | -1.31  | -0.09 | 0.76 | 0.96 |
| Lobule_3_white_matter                             | 0.15  | 0.01 | 0.15  | 0.02 | 1.10   | 0.09  | 0.74 | 0.96 |
| Trunk_of_lobules_1_3<br>White_matter              | 0.12  | 0.01 | 0.12  | 0.01 | 2.12   | 0.20  | 0.47 | 0.96 |
| Lobules_4_5_white_matter                          | 0.49  | 0.04 | 0.48  | 0.06 | 1.97   | 0.16  | 0.55 | 0.96 |
| Lobules_6_7_white_matter                          | 0.59  | 0.03 | 0.63  | 0.07 | -5.40  | -0.51 | 0.05 | 0.96 |
| Lobule_8_white_matter                             | 0.12  | 0.01 | 0.13  | 0.02 | -4.19  | -0.25 | 0.32 | 0.96 |
| Trunk_of_lobules_6_8<br>White_matter              | 0.09  | 0.00 | 0.09  | 0.01 | -2.58  | -0.35 | 0.21 | 0.96 |
| Lobule_9_white_matter                             | 0.24  | 0.02 | 0.25  | 0.03 | -1.52  | -0.11 | 0.68 | 0.96 |
| Lobule_10_white_matter                            | 0.07  | 0.01 | 0.06  | 0.01 | 3.31   | 0.15  | 0.55 | 0.96 |
| Anterior_lobule_white_matter                      | 0.08  | 0.01 | 0.08  | 0.01 | 1.08   | 0.11  | 0.68 | 0.96 |
| Simple_lobule_white_matter                        | 0.35  | 0.02 | 0.33  | 0.02 | 3.65   | 0.50  | 0.07 | 0.96 |
| Crus_1_white_matter                               | 0.32  | 0.02 | 0.32  | 0.03 | 0.97   | 0.11  | 0.66 | 0.96 |
| Trunk_of_simple_and_crus_1<br>White_matter        | 0.13  | 0.01 | 0.13  | 0.01 | -0.63  | -0.06 | 0.81 | 0.96 |
| Crus_2_white_matter                               | 0.22  | 0.01 | 0.22  | 0.02 | -2.01  | -0.27 | 0.36 | 0.96 |
| Paramedian_lobule                                 | 0.13  | 0.01 | 0.13  | 0.01 | -2.22  | -0.20 | 0.46 | 0.96 |
| Trunk_of_crus_2_and<br>Paramedian_white_matter    | 0.27  | 0.02 | 0.28  | 0.02 | -0.49  | -0.06 | 0.83 | 0.96 |
| Copula_white_matter                               | 0.06  | 0.00 | 0.06  | 0.01 | -0.99  | -0.10 | 0.70 | 0.96 |
| Paraflocculus_white_matter                        | 0.25  | 0.02 | 0.25  | 0.02 | -0.87  | -0.12 | 0.72 | 0.96 |
| Flocculus_white_matter                            | 0.07  | 0.01 | 0.07  | 0.01 | 1.75   | 0.20  | 0.51 | 0.96 |
| Dentate_nucleus                                   | 0.34  | 0.02 | 0.33  | 0.03 | 3.46   | 0.37  | 0.16 | 0.96 |
| Nucleus_interpositus                              | 0.44  | 0.03 | 0.43  | 0.04 | 1.96   | 0.20  | 0.45 | 0.96 |
| Fastigial_nucleus                                 | 0.47  | 0.03 | 0.46  | 0.05 | 1.76   | 0.16  | 0.53 | 0.96 |
| Cingulate_cortex_area_24a                         | 1.95  | 0.17 | 1.97  | 0.12 | -0.99  | -0.16 | 0.67 | 0.96 |
| Cingulate_cortex_area_24a.l                       | 0.76  | 0.03 | 0.77  | 0.04 | -0.51  | -0.10 | 0.73 | 0.96 |
| Cingulate_cortex_area_24b                         | 1.74  | 0.14 | 1.72  | 0.11 | 1.58   | 0.25  | 0.50 | 0.96 |
| Cingulate_cortex_area_24b.l                       | 0.64  | 0.03 | 0.64  | 0.03 | -0.06  | -0.01 | 0.97 | 0.98 |
| Cingulate_cortex_area_25                          | 0.61  | 0.06 | 0.60  | 0.04 | 1.38   | 0.19  | 0.61 | 0.96 |
| Cingulate_cortex_area_29a                         | 0.71  | 0.05 | 0.71  | 0.06 | -0.25  | -0.03 | 0.91 | 0.97 |
| Cingulate_cortex_area_29b                         | 0.40  | 0.02 | 0.40  | 0.03 | 0.28   | 0.04  | 0.89 | 0.96 |

|                                                      |       |      |       |      |       |       |      |      |
|------------------------------------------------------|-------|------|-------|------|-------|-------|------|------|
| Cingulate_cortex_area_29c                            | 1.92  | 0.09 | 1.91  | 0.09 | 0.46  | 0.09  | 0.76 | 0.96 |
| Cingulate_cortex_area_30                             | 2.85  | 0.19 | 2.85  | 0.15 | -0.13 | -0.03 | 0.94 | 0.98 |
| Cingulate_cortex_area_32                             | 2.62  | 0.30 | 2.59  | 0.21 | 1.27  | 0.15  | 0.69 | 0.96 |
| Amygdalopiriform_transition_area                     | 1.00  | 0.05 | 1.00  | 0.05 | -0.48 | -0.11 | 0.74 | 0.96 |
| Primary_auditory_cortex                              | 1.37  | 0.07 | 1.36  | 0.08 | 0.32  | 0.05  | 0.86 | 0.96 |
| Secondary_auditory_cortex<br>Dorsal_area             | 1.39  | 0.07 | 1.40  | 0.07 | -0.15 | -0.03 | 0.92 | 0.97 |
| Secondary_auditory_cortex<br>Ventral_area            | 1.56  | 0.12 | 1.55  | 0.12 | 0.35  | 0.05  | 0.88 | 0.96 |
| Caudomedial_entorhinal_cortex                        | 5.62  | 0.33 | 5.72  | 0.24 | -1.72 | -0.42 | 0.29 | 0.96 |
| Cingulum                                             | 0.80  | 0.05 | 0.80  | 0.05 | 0.04  | 0.01  | 0.98 | 0.99 |
| Clastrum                                             | 0.29  | 0.02 | 0.29  | 0.02 | 2.22  | 0.33  | 0.27 | 0.96 |
| Cortex_amygdala_transition_zones                     | 0.72  | 0.05 | 0.75  | 0.06 | -4.67 | -0.60 | 0.04 | 0.96 |
| Clastrum_dorsal_part                                 | 0.25  | 0.02 | 0.25  | 0.02 | 1.33  | 0.17  | 0.56 | 0.96 |
| Dorsal_nucleus_of<br>The_endopiriform                | 1.41  | 0.12 | 1.39  | 0.12 | 1.89  | 0.22  | 0.49 | 0.96 |
| Dorsal_intermediate<br>Entorhinal_cortex             | 1.81  | 0.08 | 1.81  | 0.10 | -0.32 | -0.06 | 0.83 | 0.96 |
| Dorsolateral_entorhinal_cortex                       | 2.55  | 0.09 | 2.55  | 0.18 | -0.12 | -0.02 | 0.95 | 0.98 |
| Dorsolateral_orbital_cortex                          | 0.77  | 0.05 | 0.79  | 0.07 | -2.76 | -0.31 | 0.26 | 0.96 |
| Dorsal_tenia_tecta                                   | 0.97  | 0.04 | 0.97  | 0.05 | 0.28  | 0.06  | 0.85 | 0.96 |
| Ectorhinal_cortex                                    | 2.95  | 0.25 | 2.89  | 0.31 | 2.16  | 0.20  | 0.48 | 0.96 |
| Frontal_cortex_area_3                                | 0.73  | 0.04 | 0.74  | 0.04 | -1.43 | -0.24 | 0.44 | 0.96 |
| Frontal_association_cortex                           | 6.53  | 0.42 | 6.59  | 0.37 | -0.99 | -0.18 | 0.60 | 0.96 |
| Intermediate_nucleus_of_the<br>Endopiriform_clastrum | 0.58  | 0.05 | 0.58  | 0.04 | -0.11 | -0.02 | 0.96 | 0.98 |
| Insular_region_not_subdivided                        | 7.53  | 0.50 | 7.58  | 0.54 | -0.71 | -0.10 | 0.75 | 0.96 |
| Lateral_orbital_cortex                               | 3.37  | 0.19 | 3.38  | 0.18 | -0.35 | -0.07 | 0.84 | 0.96 |
| Lateral_parietal_association_cortex                  | 0.24  | 0.02 | 0.24  | 0.02 | -0.39 | -0.05 | 0.87 | 0.96 |
| Primary_motor_cortex                                 | 6.85  | 0.25 | 6.90  | 0.34 | -0.69 | -0.14 | 0.62 | 0.96 |
| Secondary_motor_cortex                               | 6.59  | 0.35 | 6.61  | 0.33 | -0.26 | -0.05 | 0.87 | 0.96 |
| Medial_entorhinal_cortex                             | 0.71  | 0.04 | 0.72  | 0.04 | -1.22 | -0.23 | 0.49 | 0.96 |
| Medial_orbital_cortex                                | 1.82  | 0.19 | 1.80  | 0.12 | 1.19  | 0.17  | 0.68 | 0.96 |
| Medial_parietal_association_cortex                   | 0.45  | 0.03 | 0.44  | 0.03 | 1.06  | 0.16  | 0.64 | 0.96 |
| Piriform_cortex                                      | 10.09 | 0.54 | 10.03 | 0.41 | 0.58  | 0.14  | 0.70 | 0.96 |
| Posterolateral_cortical<br>Amygdaloid_area           | 0.87  | 0.05 | 0.89  | 0.05 | -1.79 | -0.32 | 0.34 | 0.96 |
| Posteromedial_cortical<br>Amygdaloid_area            | 1.06  | 0.07 | 1.07  | 0.06 | -0.36 | -0.06 | 0.85 | 0.96 |
| Perirhinal_cortex                                    | 2.64  | 0.16 | 2.62  | 0.23 | 0.64  | 0.07  | 0.79 | 0.96 |
| Parietal_cortex_posterior_area<br>Rostral_part       | 0.13  | 0.01 | 0.13  | 0.01 | -2.22 | -0.37 | 0.23 | 0.96 |
| Rostral_amygdalopiriform_area                        | 0.42  | 0.03 | 0.43  | 0.03 | -2.50 | -0.38 | 0.25 | 0.96 |
| Primary_somatosensory_cortex                         | 4.11  | 0.28 | 4.17  | 0.22 | -1.51 | -0.28 | 0.44 | 0.96 |
| Primary_somatosensory_cortex<br>Barrel_field         | 9.25  | 0.50 | 9.35  | 0.55 | -1.03 | -0.17 | 0.56 | 0.96 |
| Primary_somatosensory_cortex<br>Dysgranular_zone     | 0.38  | 0.02 | 0.39  | 0.02 | -1.60 | -0.29 | 0.38 | 0.96 |
| Primary_somatosensory_cortex<br>Forelimb_region      | 3.94  | 0.24 | 3.99  | 0.23 | -1.23 | -0.21 | 0.51 | 0.96 |
| Primary_somatosensory_cortex<br>Hindlimb_region      | 2.80  | 0.14 | 2.82  | 0.13 | -0.68 | -0.15 | 0.66 | 0.96 |
| Primary_somatosensory_cortex<br>Jaw_region           | 0.61  | 0.06 | 0.62  | 0.05 | -1.98 | -0.24 | 0.49 | 0.96 |
| Primary_somatosensory_cortex<br>Shoulder_region      | 0.20  | 0.01 | 0.20  | 0.01 | -0.24 | -0.06 | 0.89 | 0.96 |

|                                                                                    |        |       |        |       |       |       |      |      |
|------------------------------------------------------------------------------------|--------|-------|--------|-------|-------|-------|------|------|
| Primary_somatosensory_cortex<br>Trunk_region                                       | 0.52   | 0.03  | 0.52   | 0.04  | -0.75 | -0.11 | 0.69 | 0.96 |
| Primary_somatosensory_cortex<br>Upper_lip_region                                   | 5.51   | 0.32  | 5.57   | 0.41  | -1.20 | -0.16 | 0.57 | 0.96 |
| Secondary_somatosensory_cortex                                                     | 7.02   | 0.58  | 7.07   | 0.46  | -0.71 | -0.11 | 0.76 | 0.96 |
| Temporal_association_area                                                          | 2.96   | 0.22  | 2.90   | 0.25  | 1.89  | 0.22  | 0.47 | 0.96 |
| Primary_visual_cortex                                                              | 2.37   | 0.16  | 2.40   | 0.18  | -1.39 | -0.18 | 0.54 | 0.96 |
| Primary_visual_cortex_binocular<br>Area                                            | 2.00   | 0.13  | 2.02   | 0.14  | -1.00 | -0.15 | 0.64 | 0.96 |
| Primary_visual_cortex_monocular<br>Area                                            | 1.89   | 0.15  | 1.91   | 0.12  | -0.95 | -0.16 | 0.67 | 0.96 |
| Secondary_visual_cortex_lateral<br>Area                                            | 2.74   | 0.16  | 2.74   | 0.20  | 0.04  | 0.01  | 0.99 | 0.99 |
| Secondary_visual_cortex_mediolateral<br>Area                                       | 1.04   | 0.10  | 1.03   | 0.08  | 0.41  | 0.05  | 0.88 | 0.96 |
| Secondary_visual_cortex_mediomedial<br>Area                                        | 1.74   | 0.14  | 1.73   | 0.14  | 0.44  | 0.05  | 0.87 | 0.96 |
| Clastrum_ventral_part                                                              | 0.54   | 0.03  | 0.53   | 0.04  | 1.61  | 0.23  | 0.42 | 0.96 |
| Ventral_nucleus_of_the_endopiriform<br>Clastrum                                    | 0.45   | 0.03  | 0.44   | 0.02  | 2.25  | 0.47  | 0.21 | 0.96 |
| Ventral_intermediate_entorhinal_cortex                                             | 1.05   | 0.05  | 1.06   | 0.06  | -0.75 | -0.14 | 0.65 | 0.96 |
| Ventral_orbital_cortex                                                             | 1.50   | 0.10  | 1.51   | 0.08  | -0.33 | -0.06 | 0.87 | 0.96 |
| Ventral_tenia_tecta                                                                | 0.10   | 0.01  | 0.10   | 0.01  | -2.96 | -0.38 | 0.24 | 0.96 |
| Ca10r                                                                              | 2.03   | 0.10  | 2.00   | 0.13  | 1.47  | 0.23  | 0.43 | 0.96 |
| Lmol                                                                               | 2.34   | 0.12  | 2.32   | 0.10  | 0.83  | 0.20  | 0.58 | 0.96 |
| Ca1rad                                                                             | 2.61   | 0.12  | 2.57   | 0.13  | 1.49  | 0.30  | 0.34 | 0.96 |
| Ca2py                                                                              | 0.19   | 0.01  | 0.18   | 0.01  | 2.91  | 0.38  | 0.21 | 0.96 |
| Ca20r                                                                              | 0.47   | 0.03  | 0.46   | 0.03  | 2.21  | 0.30  | 0.34 | 0.96 |
| Ca2rad                                                                             | 0.47   | 0.03  | 0.46   | 0.03  | 2.41  | 0.36  | 0.24 | 0.96 |
| Ca3py_inner                                                                        | 0.15   | 0.01  | 0.15   | 0.01  | 2.23  | 0.42  | 0.22 | 0.96 |
| Ca3py_outer                                                                        | 1.01   | 0.11  | 0.97   | 0.06  | 4.00  | 0.63  | 0.16 | 0.96 |
| Ca30r                                                                              | 2.85   | 0.36  | 2.77   | 0.17  | 3.02  | 0.48  | 0.36 | 0.96 |
| Ca3rad                                                                             | 1.85   | 0.15  | 1.79   | 0.10  | 3.58  | 0.67  | 0.11 | 0.96 |
| Slu                                                                                | 0.76   | 0.07  | 0.73   | 0.04  | 3.79  | 0.63  | 0.14 | 0.96 |
| Modg                                                                               | 4.12   | 0.25  | 4.04   | 0.21  | 2.10  | 0.40  | 0.26 | 0.96 |
| Grdg                                                                               | 1.29   | 0.08  | 1.25   | 0.06  | 3.04  | 0.61  | 0.10 | 0.96 |
| Podg                                                                               | 0.63   | 0.04  | 0.61   | 0.03  | 2.67  | 0.50  | 0.14 | 0.96 |
| Ca1py                                                                              | 1.11   | 0.06  | 1.09   | 0.07  | 2.10  | 0.33  | 0.27 | 0.96 |
| Olfactory_bulb_glomerular_layer                                                    | 4.25   | 0.22  | 4.28   | 0.24  | -0.69 | -0.12 | 0.69 | 0.96 |
| Olfactory_bulb_external<br>Plexiform_layer                                         | 6.46   | 0.24  | 6.41   | 0.31  | 0.76  | 0.15  | 0.59 | 0.96 |
| Olfactory_bulb_mitral_cell_layer                                                   | 1.29   | 0.04  | 1.26   | 0.06  | 2.10  | 0.48  | 0.10 | 0.96 |
| Olfactory_bulb_internal<br>Plexiform_layer                                         | 1.12   | 0.04  | 1.09   | 0.05  | 2.57  | 0.59  | 0.05 | 0.96 |
| Olfactory_bulb_granule_cell_layer                                                  | 4.64   | 0.15  | 4.49   | 0.19  | 3.27  | 0.75  | 0.01 | 0.96 |
| Accessory_olfactory_bulb<br>Glomerular_external_plexiform<br>And_mitral_cell_layer | 0.50   | 0.03  | 0.49   | 0.02  | 1.18  | 0.25  | 0.47 | 0.96 |
| Accessory_olfactory_bulb<br>Granule_cell_layer                                     | 0.25   | 0.02  | 0.24   | 0.02  | 3.84  | 0.59  | 0.14 | 0.96 |
| Anterior_olfactory_nucleus                                                         | 2.04   | 0.08  | 1.99   | 0.10  | 2.04  | 0.40  | 0.17 | 0.96 |
| Subiculum                                                                          | 3.25   | 0.17  | 3.21   | 0.17  | 1.31  | 0.24  | 0.44 | 0.96 |
| Medial_amygdala                                                                    | 1.09   | 0.06  | 1.09   | 0.07  | -0.50 | -0.08 | 0.78 | 0.96 |
| Medial_preoptic_nucleus                                                            | 0.21   | 0.01  | 0.21   | 0.01  | 0.69  | 0.10  | 0.76 | 0.96 |
| Brain volumes                                                                      | 441.19 | 12.50 | 440.55 | 13.81 | 0.15  | 0.05  | 0.88 |      |

**Supplementary Table 2** List of brain regions subjected to C-FOS staining and the *P* values for the comparisons among four groups (related to Fig. 2).

| Brain regions                                     | Abbr.             | P values of each comparison of C-FOS+ cell No. |            |          |               | Atlas Section No. |
|---------------------------------------------------|-------------------|------------------------------------------------|------------|----------|---------------|-------------------|
|                                                   |                   | ♂M120I:♂WT                                     | ♀M120I:♀WT | ♀WT: ♂WT | ♀M120I:♂M120I |                   |
| <b>Cortical regions</b>                           |                   |                                                |            |          |               |                   |
| mPFC-Prelimbic area                               | PL                | 0.2756                                         | 0.5962     | 0.6079   | 0.009**↑      | 41                |
| mPFC-Infralimbic area                             | ILA               | 0.0135*↓                                       | 0.0709     | 0.1672   | 0.0134*↑      | 39                |
| Anterior cingulate area, dorsal                   | ACA <sub>d</sub>  | 0.9215                                         | 0.9286     | 0.2049   | 0.2616        | 41                |
| Anterior cingulate area, ventral                  | ACA <sub>v</sub>  | 0.5965                                         | 0.7435     | 0.2757   | 0.6262        | 44                |
| Endopiriform nucleus                              | EP <sub>d</sub>   | 0.6582                                         | 0.3547     | 0.3529   | 0.5926        | 44                |
| Piriform cortex                                   | PIR               | 0.7557                                         | 0.8429     | 0.5947   | 0.9207        | 44                |
| Retrosplenial area, dorsal                        | RSP <sub>d</sub>  | 0.9838                                         | 0.9999     | 0.5242   | 0.6306        | 70                |
| Retrosplenial area, ventral                       | RSP <sub>v</sub>  | 0.796                                          | 0.7007     | 0.5725   | 0.5714        | 70                |
| Primary motor area                                | Mop               | 0.7134                                         | 0.9972     | 0.0742   | 0.289         | 70                |
| Secondary motor area                              | Mos               | 0.7424                                         | 0.4809     | 0.0784   | 0.2582        | 70                |
| <b>Pallidum regions</b>                           |                   |                                                |            |          |               |                   |
| Lateral septal nucleus, rostral                   | LS <sub>r</sub>   | 0.0488*↓                                       | 0.8        | 0.502    | 0.4535        | 48                |
| Medial septal nucleus                             | MS                | 0.0114*↓                                       | 0.2439     | 0.5024   | 0.0532        | 48                |
| Caudoputamen                                      | CP                | 0.297                                          | 0.5683     | 0.3904   | 0.5141        | 48                |
| Bed nuclei of the stria terminalis, anteriomedial | BST <sub>am</sub> | 0.0119*↓                                       | 0.6237     | 0.3371   | 0.0401*↑      | 48                |
| Nucleus accumbens                                 | ACB               | 0.6323                                         | 0.6769     | 0.4298   | 0.0603        | 44                |
| Taenia tecta, dorsal part                         | TT <sub>d</sub>   | 0.1089                                         | 0.6014     | 0.8614   | 0.0859        | 41                |
| <b>Hippocampus regions</b>                        |                   |                                                |            |          |               |                   |
| Dorsal CA1                                        | CA1 <sub>d</sub>  | 0.902                                          | 0.9846     | 0.5251   | 0.5776        | 70                |
| Dorsal CA3                                        | CA3 <sub>d</sub>  | 0.1114                                         | 0.9697     | 0.8633   | 0.1081        | 70                |
| Dentate gyrus, dorsal                             | DG <sub>d</sub>   | 0.0136*↓                                       | 0.5402     | 0.6744   | 0.027*↑       | 70                |
| Ventral CA1                                       | CA1 <sub>v</sub>  | 0.233                                          | 0.9171     | 0.3321   | 0.0852        | 82                |
| Ventral subiculum                                 | SUB <sub>v</sub>  | 0.0592                                         | 0.1192     | 0.1601   | 0.3004        | 82                |
| <b>Thalamus/Hypothalamus regions</b>              |                   |                                                |            |          |               |                   |
| Lateral Habenula                                  | LH                | 0.5196                                         | 0.044*↓    | 0.3059   | 0.7519        | 68                |
| Mediodorsal nucleus of thalamus                   | MD                | 0.7461                                         | 0.9151     | 0.8355   | 0.7662        | 68                |
| Paraventricular nucleus of the thalamus           | PVT               | 0.0543                                         | 0.7234     | 0.0469*↓ | 0.7862        | 68                |
| Dorsomedial nucleus of the hypothalamus           | DMH               | 0.0791                                         | 0.758      | 0.0717   | 0.9589        | 68                |
| Ventromedial hypothalamic nucleus                 | VMH               | 0.219                                          | 0.8746     | 0.822    | 0.1881        | 68                |
| <b>Amygdala regions</b>                           |                   |                                                |            |          |               |                   |
| Medial amygdala, ventral                          | MEA <sub>v</sub>  | 0.7948                                         | 0.7511     | 0.8579   | 0.471         | 70                |
| Medial amygdala, dorsal                           | MEA <sub>d</sub>  | 0.0931                                         | 0.6533     | 0.9874   | 0.0556        | 70                |
| Lateral amygdala                                  | LA                | 0.7352                                         | 0.0384*↑   | 0.8454   | 0.0947        | 73                |
| Basolateral amygdala                              | BLA <sub>a</sub>  | 0.0019**↓                                      | 0.9818     | 0.6752   | 0.0044**↑     | 70                |
| <b>Midbrain regions</b>                           |                   |                                                |            |          |               |                   |
| Ventral tegmental area                            | VTA               | 0.0081**↓                                      | 0.8432     | 0.6787   | 0.0291*↑      | 82                |

\*, *P* < 0.05; \*\*, *P* < 0.01.

**Supplementary Table 3 The ratios of mean C-FOS+ cell density across 31 brain regions (related to Fig. 2A).**

| Brain regions                                     | C-FOS+ cell No./mm <sup>2</sup> |                |              | Atlas Section No. |
|---------------------------------------------------|---------------------------------|----------------|--------------|-------------------|
|                                                   | Abbr.                           | ♂WT/♂MI20I     | ♀WT/♀MI20I   |                   |
| <b>Cortical regions</b>                           |                                 |                |              |                   |
| mPFC-Prelimbic area                               | PL                              | 640.4/632.7    | 696/839.5    | 39                |
| mPFC-Infralimbic area                             | ILA                             | 584.5/373.7*   | 437.6/708.6  | 39                |
| Anterior cingulate area, dorsal                   | ACA <sub>d</sub>                | 438.4/449.4    | 608.4/624    | 41                |
| Anterior cingulate area, ventral                  | ACA <sub>v</sub>                | 650.4/721.3    | 869/796.9    | 44                |
| Endopiriform nucleus                              | EP <sub>d</sub>                 | 353.1/387.5    | 448.7/339    | 44                |
| Piriform cortex                                   | PIR                             | 806/867.9      | 938.9/888    | 44                |
| Retrosplenial area, dorsal                        | RSP <sub>d</sub>                | 635.2/631.6    | 751/751.1    | 70                |
| Retrosplenial area, ventral                       | RSP <sub>v</sub>                | 723.8/677.1    | 867.6/770.5  | 70                |
| Primary motor area                                | Mop                             | 411.3/467.7    | 690.4/689.7  | 70                |
| Secondary motor area                              | Mos                             | 495.4/465.6    | 784.1/640.1  | 70                |
| <b>Pallidum regions</b>                           |                                 |                |              |                   |
| Lateral septal nucleus, rostral                   | LSr                             | 307.3/194      | 258.6/291.4  | 44                |
| Medial septal nucleus                             | MS                              | 204.9/148      | 243.7/272.9  | 44                |
| Caudoputmen                                       | CP                              | 45.19/45.32    | 68.58/62.18  | 44                |
| Bed nuclei of the stria terminalis, anteriomedial | BST <sub>am</sub>               | 362.6/191**    | 297.5/331.8  | 48                |
| Nucleus accumbens                                 | ACB                             | 140.9/124.3    | 175.2/193.3  | 44                |
| Taenia tecta, dorsal part                         | TT <sub>d</sub>                 | 242.9/163.8    | 232.1/272.1  | 41                |
| <b>Hippocampus regions</b>                        |                                 |                |              |                   |
| Dorsal CA1                                        | CA1 <sub>d</sub>                | 177.8/191.8    | 269.8/266.6  | 70                |
| Dorsal CA3                                        | CA3 <sub>d</sub>                | 619.5/444.3    | 644/650.1    | 70                |
| Dentate gyrus, dorsal                             | DG <sub>d</sub>                 | 450.9/280*     | 416/476.7    | 70                |
| Ventral CA1                                       | CA1 <sub>v</sub>                | 316.9/268.5    | 378.3/387.2  | 82                |
| Ventral subiculum                                 | SUB <sub>v</sub>                | 287.5/194.2    | 360.3/256.4  | 86                |
| <b>Thalamus / Hypothalamus regions</b>            |                                 |                |              |                   |
| Lateral Habenula                                  | LH                              | 503.2/410.4    | 685.4/382.9* | 68                |
| Mediodorsal nucleus of thalamus                   | MD                              | 179.2/117.9    | 193.2/177.5  | 70                |
| Paraventricular nucleus of the thalamus           | PVT                             | 856.9/686.3    | 868.4/817    | 70                |
| Dorsomedial nucleus of the hypothalamus           | DMH                             | 543.6/354.7    | 401.2/444.2  | 70                |
| Ventromedial hypothalamic nucleus                 | VMH                             | 135.2/58.48*   | 111.4/102.1  | 70                |
| <b>Amygdala regions</b>                           |                                 |                |              |                   |
| Medial amygdala, ventral                          | MEA <sub>v</sub>                | 222.7/197      | 240.7/275.3  | 70                |
| Medial amygdala, dorsal                           | MEA <sub>d</sub>                | 304.4/192.6    | 305.5/341.7  | 70                |
| Lateral amygdala                                  | LA                              | 340.9/359.6    | 330.5/482.4* | 73                |
| Basolateral amygdala, anterior                    | BLA <sub>a</sub>                | 374.5/206.1*** | 353.9/352.8  | 70                |
| <b>Midbrain regions</b>                           |                                 |                |              |                   |
| Ventral tegmental area                            | VTA                             | 187.9/96.48**  | 201.5/211.7  | 82                |

\*, P < 0.05; \*\*, P < 0.01; \*\*\*, P < 0.001.



**Supplementary Table 4 Differentially expressed proteins in ILA synaptic proteomes between male M120I mutant and male wild-type mice (related to Fig. 4).**

| DEPs of male M120 vs. male WT |                                |              |                              |                                           |
|-------------------------------|--------------------------------|--------------|------------------------------|-------------------------------------------|
| Accession                     | Gene Symbol                    | Coverage [%] | Abundance Ratio: (MH) / (MW) | Abundance Ratio Adj. P-Value: (MH) / (MW) |
| O08644                        | Ephb6                          | 10           | 0.037                        | 2.52E-16                                  |
| Q80TA1                        | Ept1; Selenoi                  | 10           | 0.349                        | 0.00230214                                |
| P63082                        | Atp6v0c; Atp6v0c-ps2           | 54           | 0.375                        | 9.46E-14                                  |
| O35683                        | Ndufa1                         | 17           | 0.386                        | 1.09E-12                                  |
| Q9CYR0                        | Ssbp1                          | 20           | 0.411                        | 0.002306137                               |
| Q8BSL7                        | Arf2                           | 59           | 0.445                        | 0.023533662                               |
| Q9D7J4                        | Cox20; Fam36a                  | 41           | 0.45                         | 0.000271368                               |
| Q6NZC7                        | Sec23ip                        | 5            | 0.485                        | 0.008629853                               |
| Q3TC33                        | Ccdc127                        | 30           | 0.491                        | 0.000142533                               |
| Q9WTP6                        | Ak2                            | 25           | 0.5                          | 0.002543283                               |
| P0DN34                        | Ndufb1 ,<br>LOC102631912       | 54           | 0.503                        | 3.04E-07                                  |
| Q8BX17                        | Gemin5                         | 2            | 0.506                        | 2.77E-05                                  |
| P00405                        | COX2                           | 63           | 0.516                        | 7.34E-07                                  |
| Q7TNS2                        | Minos1                         | 63           | 0.516                        | 4.24E-07                                  |
| P63137                        | Gabrb2                         | 16           | 0.527                        | 0.007047227                               |
| O35343                        | Kpna4                          | 28           | 0.537                        | 0.009786457                               |
| Q9JI91                        | Actn2                          | 56           | 0.538                        | 3.52E-06                                  |
| Q60771                        | Cldn11                         | 26           | 0.559                        | 1.15E-05                                  |
| P68033                        | Actc1                          | 62           | 0.573                        | 4.40E-05                                  |
| P56391                        | Cox6b1                         | 80           | 0.574                        | 4.59E-05                                  |
| P20917                        | Mag                            | 20           | 0.575                        | 6.59E-05                                  |
| P03893                        | ND2                            | 15           | 0.58                         | 0.003984846                               |
| Q8C460                        | Eri3                           | 9            | 0.58                         | 0.013933869                               |
| P07310                        | Ckm                            | 10           | 0.586                        | 0.023005161                               |
| Q9CR21                        | Ndufab1                        | 15           | 0.587                        | 0.001973723                               |
| Q3UIU2                        | Ndufb6                         | 70           | 0.591                        | 0.000559492                               |
| Q9CQ91                        | Ndufa3                         | 50           | 0.601                        | 0.000397039                               |
| Q9CXZ1                        | Ndufs4                         | 53           | 0.607                        | 0.001000742                               |
| Q9CPX8                        | Uqcr11                         | 64           | 0.617                        | 0.000984048                               |
| Q9CQJ8                        | Ndufb9                         | 75           | 0.623                        | 0.000691021                               |
| Q8BIG7                        | Comtd1                         | 50           | 0.634                        | 0.001975411                               |
| Q8R3R8                        | Gabarapl1                      | 26           | 0.642                        | 0.016311935                               |
| Q7TPR4                        | Actn1                          | 83           | 0.643                        | 0.001735599                               |
| Q61885                        | Mog                            | 39           | 0.646                        | 0.002418096                               |
| Q8CC35                        | Synpo                          | 50           | 0.666                        | 0.006040417                               |
| Q3UTJ2                        | Sorbs2                         | 31           | 0.673                        | 0.005564212                               |
| Q9DCZ4                        | Apoo                           | 67           | 0.679                        | 0.015616574                               |
| B9EJA2                        | Cttnbp2                        | 7            | 0.68                         | 0.015616574                               |
| Q62108                        | Dlg4                           | 63           | 0.684                        | 0.009465882                               |
| Q9DC70                        | Ndufs7                         | 54           | 0.691                        | 0.02158813                                |
| F6SEU4                        | Syngap1                        | 69           | 0.694                        | 0.01366126                                |
| Q80Z38                        | Shank2                         | 44           | 0.698                        | 0.007899757                               |
| Q9D2R6                        | Coa3                           | 27           | 0.699                        | 0.015616574                               |
| Q9QZD9                        | Eif3i                          | 51           | 1.567                        | 0.042851124                               |
| P83882                        | Rpl36a1; Rpl36a;<br>Rpl36a-ps3 | 25           | 1.572                        | 0.048017343                               |

|        |                                                                                                             |    |        |             |
|--------|-------------------------------------------------------------------------------------------------------------|----|--------|-------------|
| O55142 | Rpl35a-ps4;<br>Rpl35a; Rpl35a-<br>ps2; Gm10243;<br>Rpl35a-ps5;<br>LOC100862595;<br>Gm14279;<br>LOC100048620 | 38 | 1.625  | 0.046561585 |
| P35803 | Gpm6b                                                                                                       | 34 | 1.63   | 0.038156786 |
| P54227 | Stmnl                                                                                                       | 58 | 1.658  | 0.036548924 |
| Q3TTY5 | Krt2                                                                                                        | 10 | 1.692  | 0.021894076 |
| O35286 | Dhx15                                                                                                       | 6  | 1.703  | 0.014132585 |
| Q9DIR9 | Rpl34-ps1; Rpl34;<br>Gm4705                                                                                 | 38 | 1.721  | 0.015616574 |
| P61514 | Rpl37a                                                                                                      | 67 | 1.735  | 0.011187981 |
| Q3UV17 | Krt76                                                                                                       | 10 | 1.744  | 0.015074469 |
| Q62093 | Srsf2                                                                                                       | 19 | 1.751  | 0.002457092 |
| Q9R0Q3 | Tmed2; Gm21540;<br>LOC100862175;<br>Gm10698                                                                 | 23 | 1.78   | 0.014185915 |
| Q9CQE7 | Ergic3                                                                                                      | 13 | 1.78   | 0.00411631  |
| P61222 | Abce1                                                                                                       | 9  | 1.798  | 0.024007321 |
| P60761 | Nrgn                                                                                                        | 60 | 1.825  | 0.001735599 |
| Q8BXR1 | Slc7a14                                                                                                     | 16 | 1.837  | 0.000574087 |
| O89084 | Pde4a                                                                                                       | 9  | 1.862  | 0.049290456 |
| Q8BGD9 | Eif4b                                                                                                       | 19 | 1.894  | 0.00060601  |
| Q9CT10 | Ranbp3                                                                                                      | 19 | 1.986  | 0.023834652 |
| PI0922 | Hlf0                                                                                                        | 21 | 2.002  | 4.22E-05    |
| Q3TMP8 | Tmem38a                                                                                                     | 14 | 2.029  | 0.014527027 |
| Q9Z204 | Hnrnpc                                                                                                      | 12 | 2.172  | 0.001669241 |
| Q9DB75 | Cdip1                                                                                                       | 14 | 2.64   | 0.000545637 |
| E9Q735 | Ube4a                                                                                                       | 9  | 3.511  | 2.52E-16    |
| Q64735 | Crll                                                                                                        | 12 | 48.126 | 2.52182E-16 |

**Supplementary Table 5 Differentially expressed proteins in ILA synaptic proteomes between female M1201 mutant and female wild-type mice (related to Fig. 4).**

| DEPs of female M1201 vs. female WT |                                                |              |                              |                                           |
|------------------------------------|------------------------------------------------|--------------|------------------------------|-------------------------------------------|
| Accession                          | Gene Symbol                                    | Coverage [%] | Abundance Ratio: (FH) / (FW) | Abundance Ratio Adj. P-Value: (FH) / (FW) |
| O09126                             | Sema4d                                         | 10           | 0.001                        | 1.18802E-16                               |
| P61622                             | Itga11                                         | 2            | 0.013                        | 1.18802E-16                               |
| P63143                             | Kcnab1                                         | 25           | 0.039                        | 1.18802E-16                               |
| P63082                             | Atp6v0c;<br>Atp6v0c-ps2                        | 54           | 0.043                        | 1.18802E-16                               |
| P00405                             | COX2                                           | 63           | 0.147                        | 1.18802E-16                               |
| Q8C5W0                             | Clmn                                           | 9            | 0.149                        | 6.10035E-06                               |
| Q9CPX8                             | Uqcr11                                         | 64           | 0.207                        | 1.18802E-16                               |
| Q9R0Q3                             | Tmed2;<br>Gm21540;<br>LOC100862175;<br>Gm10698 | 25           | 0.235                        | 1.97797E-11                               |
| Q8RIT1                             | Chmp7                                          | 13           | 0.241                        | 0.013851368                               |
| Q9JJK8                             | Atr                                            | 1            | 0.27                         | 2.12072E-12                               |
| Q9CYN2                             | Spcs2                                          | 27           | 0.3                          | 0.000353441                               |
| P03888                             | ND1                                            | 15           | 0.307                        | 4.3806E-13                                |
| P47743                             | Grm8                                           | 8            | 0.313                        | 0.001303942                               |
| Q91YH5                             | Atl3                                           | 25           | 0.315                        | 0.002298174                               |
| Q91VW3                             | Sh3bgrl3                                       | 22           | 0.316                        | 4.59475E-07                               |
| Q9ERS2                             | Ndufa13                                        | 67           | 0.318                        | 8.02055E-10                               |
| Q7TNS2                             | Minos1                                         | 53           | 0.322                        | 3.37472E-09                               |
| Q8BGZ1                             | Hpcal4                                         | 90           | 0.326                        | 2.41198E-13                               |
| Q924M7                             | Mpi                                            | 39           | 0.335                        | 0.001224408                               |
| Q04899                             | Cdk18                                          | 19           | 0.338                        | 0.023384464                               |
| Q8K3J1                             | Ndufs8                                         | 51           | 0.352                        | 2.45271E-09                               |
| Q9D8S4                             | Rexo2                                          | 17           | 0.36                         | 0.000938889                               |
| P56391                             | Cox6b1                                         | 80           | 0.365                        | 8.82735E-08                               |
| Q9CQ91                             | Ndufa3                                         | 50           | 0.369                        | 3.1217E-07                                |
| Q922F4                             | Tubb6                                          | 48           | 0.373                        | 1.87681E-07                               |
| Q9JM14                             | Nt5c                                           | 39           | 0.375                        | 9.46696E-07                               |
| Q99K10                             | Nlgn1                                          | 13           | 0.381                        | 0.001850105                               |
| Q9WTT4                             | Atp6v1g2                                       | 76           | 0.387                        | 1.32879E-07                               |
| Q8BFZ3                             | Actb12                                         | 60           | 0.388                        | 1.935E-06                                 |
| P03911                             | ND4                                            | 22           | 0.393                        | 1.51841E-08                               |
| P56959                             | Fus                                            | 17           | 0.395                        | 3.89875E-05                               |
| Q8BFY6                             | Pef1                                           | 20           | 0.398                        | 0.003097794                               |
| P03893                             | ND2                                            | 15           | 0.399                        | 0.000567904                               |
| Q9CQJ8                             | Ndufb9                                         | 75           | 0.4                          | 1.54759E-06                               |
| Q9CQZ6                             | Ndufb3                                         | 35           | 0.429                        | 2.37058E-07                               |
| Q9DB10                             | I500032L24Rik;<br>Smdt1                        | 51           | 0.431                        | 2.50971E-05                               |
| O35972                             | Mrpl23; Mrpl23-ps1                             | 17           | 0.432                        | 0.038016273                               |

|        |                     |    |       |             |
|--------|---------------------|----|-------|-------------|
| P62823 | Rab3c               | 56 | 0.435 | 1.64095E-05 |
| P70392 | Rasgrf2             | 17 | 0.441 | 8.90654E-05 |
| P12815 | Pdcd6               | 51 | 0.444 | 3.44459E-05 |
| P29387 | Gnb4                | 71 | 0.458 | 4.0065E-06  |
| O88967 | Yme111              | 8  | 0.462 | 0.010078828 |
| P63216 | Gng3                | 84 | 0.463 | 3.68853E-05 |
| Q9JL26 | Fmnl1               | 5  | 0.464 | 0.04869973  |
| P68372 | Tubb4b              | 80 | 0.475 | 0.000156708 |
| Q9CPQ3 | Tomm22              | 66 | 0.475 | 7.72991E-05 |
| P48771 | Cox7a2              | 60 | 0.477 | 3.44459E-05 |
| Q8BHL3 | Tbc1d10b            | 26 | 0.479 | 0.001984545 |
| P21460 | Cst3                | 45 | 0.481 | 0.000206924 |
| Q5M8N0 | Cnrip1              | 77 | 0.487 | 0.000299139 |
| Q8BMP6 | Acbd3               | 27 | 0.49  | 0.025095345 |
| Q9CQ69 | Uqcrq               | 80 | 0.491 | 0.000358226 |
| O09167 | Rpl21               | 33 | 0.493 | 2.90414E-05 |
| Q9ERD7 | Tubb3               | 82 | 0.505 | 0.000670343 |
| Q3UIU2 | Ndufb6              | 80 | 0.509 | 0.000216884 |
| P20917 | Mag                 | 21 | 0.51  | 0.000575635 |
| P70699 | Gaa                 | 25 | 0.511 | 0.00086395  |
| O08529 | Capn2               | 27 | 0.515 | 0.019177034 |
| Q6P456 | Sik3                | 7  | 0.516 | 0.044474514 |
| P56480 | Atp5b               | 82 | 0.531 | 0.001986489 |
| Q9CQ85 | Timm22              | 31 | 0.533 | 0.002219517 |
| Q91YX5 | Lpgat1              | 29 | 0.541 | 0.002931225 |
| Q7TMM9 | Tubb2a              | 85 | 0.545 | 0.003436721 |
| Q9CRA5 | Golph3              | 28 | 0.547 | 0.006579528 |
| Q80VP9 | Asphd2              | 38 | 0.549 | 0.015716548 |
| P26883 | Fkbp1a              | 46 | 0.557 | 0.000543954 |
| Q9QXX4 | Slc25a13            | 8  | 0.571 | 0.000660933 |
| Q8BG67 | Efr3a               | 17 | 0.573 | 0.048065096 |
| Q6NS82 | Fam134a;<br>Retreg2 | 15 | 0.575 | 0.019476187 |
| Q9DCS9 | Ndufb10             | 64 | 0.577 | 0.010133652 |
| P43274 | Hist1hle            | 26 | 0.578 | 0.019014589 |
| Q60771 | Cldn11              | 43 | 0.578 | 0.001910945 |
| Q9CXVI | Sdhc                | 28 | 0.58  | 0.004939999 |
| Q61335 | Bcap3l              | 31 | 0.581 | 0.020281428 |
| Q91XV3 | Baspl               | 94 | 0.583 | 0.012377759 |
| P63330 | Ppp2ca              | 75 | 0.586 | 0.023987164 |
| Q9CXZI | Ndufs4              | 53 | 0.588 | 0.006146643 |
| Q62283 | Tspan7              | 18 | 0.591 | 0.004939999 |
| Q9DIG1 | Rab1b               | 69 | 0.594 | 0.003063448 |
| Q80V26 | Impad1              | 28 | 0.6   | 0.024957973 |
| Q8BGN3 | Enpp6               | 25 | 0.61  | 0.027039968 |

|        |                      |    |       |             |
|--------|----------------------|----|-------|-------------|
| Q9QZB0 | Rgs17                | 46 | 0.614 | 0.031229385 |
| Q6DFY8 | Brinp2; Fam5b        | 13 | 0.614 | 0.027707668 |
| Q8VCD6 | Reep2                | 28 | 0.616 | 0.035314337 |
| Q91WD5 | Ndufs2               | 75 | 0.617 | 0.032936418 |
| Q9D855 | Uqcrb                | 59 | 0.619 | 0.034079545 |
| Q8VEH3 | Arl8a                | 68 | 0.62  | 0.041359322 |
| Q9D0R2 | Tars                 | 17 | 0.62  | 0.015377939 |
| Q9CPQ8 | Atp5l                | 71 | 0.623 | 0.038062755 |
| Q8R164 | Bphl                 | 43 | 0.625 | 0.023274899 |
| Q9JKL4 | Ndufaf3              | 35 | 0.627 | 0.042877446 |
| Q3UUI3 | Them4                | 34 | 0.63  | 0.009511258 |
| P55096 | Abcd3                | 33 | 0.631 | 0.041340881 |
| Q8R404 | 2410015M20Rik        | 72 | 0.638 | 0.013671075 |
| Q9EPJ9 | Arfgap1              | 69 | 0.652 | 0.037797986 |
| Q9DBE8 | Alg2                 | 51 | 0.654 | 0.023274899 |
| Q99J16 | Rap1b                | 82 | 0.655 | 0.017506862 |
| P04925 | Prnp                 | 52 | 0.663 | 0.04238861  |
| P08551 | Nefl                 | 58 | 0.668 | 0.04631721  |
| O70435 | Psm3                 | 37 | 1.671 | 0.035705029 |
| P09528 | Fth1                 | 57 | 1.692 | 0.028777433 |
| P99026 | Psm4                 | 48 | 1.719 | 0.042448959 |
| P08228 | Sod1                 | 88 | 1.731 | 0.035705029 |
| P01942 | Hba-a1; Hba-a2       | 70 | 1.781 | 0.023987164 |
| Q61016 | Gng7                 | 72 | 1.781 | 0.023987164 |
| Q3TCJ1 | Fam175b;<br>Abraxas2 | 6  | 1.803 | 0.043475802 |
| Q99K70 | Rragc                | 40 | 1.812 | 0.019476187 |
| O55100 | Syng1                | 18 | 1.828 | 0.015317184 |
| Q5XG73 | Acdb5                | 4  | 1.859 | 0.010751721 |
| Q7SIG6 | Asap2                | 13 | 1.878 | 0.00942027  |
| Q6IFX2 | Krt42                | 26 | 1.98  | 0.003346272 |
| P97450 | Atp5j                | 31 | 2.146 | 0.024003019 |
| Q61781 | Krt14                | 27 | 2.191 | 0.000146515 |
| Q3UV17 | Krt76                | 8  | 2.211 | 0.000272019 |
| P70236 | Map2k6               | 11 | 2.239 | 0.049316736 |
| Q8BH58 | Tipr1                | 15 | 2.309 | 0.01382927  |
| Q8QZV4 | Stk32c               | 24 | 2.343 | 0.035015635 |
| P60761 | Nrgn                 | 60 | 2.389 | 2.12247E-05 |
| Q922U2 | Krt5                 | 24 | 2.457 | 2.12247E-05 |
| P04104 | Krt1                 | 6  | 2.611 | 3.93323E-06 |
| Q8VED5 | Krt79                | 9  | 2.682 | 6.25171E-08 |
| Q3TTY5 | Krt2                 | 10 | 2.7   | 1.47974E-06 |
| O88735 | Map7; Mtap7          | 3  | 2.807 | 2.48552E-06 |
| Q6Y685 | Tacc1                | 3  | 2.964 | 0.003971802 |
| Q91YW3 | Dnajc3               | 12 | 3.005 | 3.38438E-09 |

|        |          |    |       |             |
|--------|----------|----|-------|-------------|
| Q6IFZ6 | Krt77    | 14 | 3.07  | 2.59696E-08 |
| Q3VI32 | Slc25a3l | 13 | 3.359 | 2.25301E-09 |
| P02535 | Krt10    | 15 | 3.499 | 2.65044E-10 |

**Supplementary Table 6 Disease associations of female differentially expressed proteins in ILA synaptic proteomes (related to Fig. 4).**

| Protein        | Function (from STRING)                                                                                                                                                                                                                                                                                                                                                                                                                                                                                                                                                                     | Disease Association                                       | Reference (PMID or DOI)                                                                                                              |
|----------------|--------------------------------------------------------------------------------------------------------------------------------------------------------------------------------------------------------------------------------------------------------------------------------------------------------------------------------------------------------------------------------------------------------------------------------------------------------------------------------------------------------------------------------------------------------------------------------------------|-----------------------------------------------------------|--------------------------------------------------------------------------------------------------------------------------------------|
| NRGN           | Neurogranin; Acts as a "third messenger" substrate of protein kinase C-mediated molecular cascades during synaptic development and remodeling.                                                                                                                                                                                                                                                                                                                                                                                                                                             | Schizophrenia                                             | 33032807                                                                                                                             |
| SOD1           | Superoxide dismutase [Cu-Zn]; Destroys radicals which are normally produced within the cells and which are toxic to biological systems.                                                                                                                                                                                                                                                                                                                                                                                                                                                    | Autism<br>Spectrum<br>Disorder                            | 24155217, 28469396                                                                                                                   |
| DNAJC3 (HSP40) | DnaJ homolog subfamily C member 3; Involved in the unfolded protein response (UPR) during endoplasmic reticulum (ER) stress. Acts as a negative regulator of the EIF2AK4/GCN2 kinase activity by preventing the phosphorylation of eIF-2-alpha at 'Ser-52' and hence attenuating general protein synthesis under ER stress, hypothermic and amino acid starving stress conditions (By similarity). Co-chaperone of HSPA8/HSC70, it stimulates its ATPase activity.                                                                                                                         | Developmental delay                                       | <a href="https://doi.org/10.1159/000358538">https://doi.org/10.1159/000358538</a>                                                    |
| TIPRL          | TIP41-like protein; May be a allosteric regulator of serine/threonine- protein phosphatase 2A (PP2A). Isoform I inhibits catalytic activity of the PP2A(D) core complex in vitro. The PP2A(C):TIPRL complex does not show phosphatase activity. Acts as negative regulator of serine/threonine-protein phosphatase 4 probably by inhibiting the formation of the active PPP4C:PPP4R2 complex.                                                                                                                                                                                              | (regulate mTOR pathway)                                   |                                                                                                                                      |
| RRAGC          | Ras-related GTP-binding protein C; Guanine nucleotide-binding protein forming heterodimeric Rag complexes required for the amino acid-induced relocalization of mTORC1 to the lysosomes and its subsequent activation by the GTPase RHEB. This is a crucial step in the activation of the TOR signaling cascade by amino acids.                                                                                                                                                                                                                                                            | Autism<br>Spectrum<br>Disorder<br>(regulate mTOR pathway) | 29875476                                                                                                                             |
| MAP7           | Ensconsin; Microtubule-stabilizing protein that may play an important role during reorganization of microtubules during polarization and differentiation of epithelial cells. Associates with microtubules in a dynamic manner. May play a role in the formation of intercellular contacts. Colocalization with TRPV4 results in the redistribution of TRPV4 toward the membrane and may link cytoskeletal microfilaments.                                                                                                                                                                 | Schizophrenia                                             | 20371615                                                                                                                             |
| FTH1           | Ferritin heavy chain; Stores iron in a soluble, non-toxic, readily available form. Important for iron homeostasis. Has ferroxidase activity. Iron is taken up in the ferrous form and deposited as ferric hydroxides after oxidation. Also plays a role in delivery of iron to cells.                                                                                                                                                                                                                                                                                                      | Autism<br>Spectrum<br>Disorder                            | 28469396                                                                                                                             |
| MAP2K6         | Dual specificity mitogen-activated protein kinase kinase 6; Dual specificity protein kinase which acts as an essential component of the MAP kinase signal transduction pathway. With MAP3K3/MKK3, catalyzes the concomitant phosphorylation of a threonine and a tyrosine residue in the MAP kinases p38 MAPK11, MAPK12, MAPK13 and MAPK14 and plays an important role in the regulation of cellular responses to cytokines and all kinds of stresses. Especially, MAP2K3/MKK3 and MAP2K6/MKK6 are both essential for the activation of MAPK11 and MAPK13 induced by environmental stress. | Autism<br>Spectrum<br>Disorder                            | <a href="https://doi.org/10.1101/209908">27842596</a><br><a href="https://doi.org/10.1101/209908">https://doi.org/10.1101/209908</a> |

**Supplementary Table 7 Statistical methods and results (related to Fig. 1, 3, 4, 5 and 6).**

| Figure                                         | Method                                                                             | Group            | Mean diff.     | 95.00% CI of diff. | P v ale        |
|------------------------------------------------|------------------------------------------------------------------------------------|------------------|----------------|--------------------|----------------|
| Fig. 1B<br>3C_sociability;<br>Male             | Interaction times;<br>Two-way<br>ANOVA; Tukey's<br>HSD multiple<br>comparison test | +/+ : S1 vs O    | 191.1          | 155.8 to 226.3     | P<0.0001, **** |
|                                                |                                                                                    | +/- : S1 vs O    | 82.62          | 46.03 to 119.2     | P<0.0001, **** |
|                                                |                                                                                    | -/- : S1 vs O    | 108.2          | 71.65 to 144.8     | P<0.0001, **** |
|                                                |                                                                                    | S1: +/+ vs +/-   | 93.49          | 57.57 to 129.4     | P<0.0001, **** |
|                                                |                                                                                    | S1: +/+ vs -/-   | 81.49          | 45.57 to 117.4     | P<0.0001, **** |
|                                                | Preference;<br>Ordinary one-way<br>ANOVA;<br>Dunnnett's.<br>comparison test        | +/+ vs +/-       | 108.5          | 70.83 to 146.1     | P<0.0001, **** |
|                                                | +/+ vs -/-                                                                         | 82.84            | 45.21 to 120.5 | P<0.0001, ****     |                |
| Fig. 1B<br>3C_sociability;<br>female           | Interaction times;<br>Two-way<br>ANOVA; Tukey's<br>HSD multiple<br>comparison test | +/+ : S1 vs O    | 200.1          | 150.7 to 249.6     | P<0.0001, **** |
|                                                |                                                                                    | +/- : S1 vs O    | 179.3          | 134.4 to 224.1     | P<0.0001, **** |
|                                                |                                                                                    | -/- : S1 vs O    | 193.6          | 137.9 to 249.4     | P<0.0001, **** |
|                                                | Preference;<br>Ordinary one-way<br>ANOVA;<br>Dunnnett's.<br>comparison test        | +/+ vs +/-       | 20.85          | -32.78 to 74.48    | P=0.5798, ns   |
|                                                |                                                                                    | +/+ vs -/-       | -10.68         | -70.54 to 49.19    | P=0.8864, ns   |
|                                                |                                                                                    |                  |                |                    |                |
| Fig. 1B<br>3C_novelty<br>preference; Male      | Interaction times;<br>Two-way<br>ANOVA; Tukey's<br>HSD multiple<br>comparison test | +/+ : S1 vs S2   | 94.43          | 52.14 to 136.7     | P<0.0001, **** |
|                                                |                                                                                    | +/- : S1 vs S2   | 41.92          | -1.963 to 85.81    | P=0.0695, ns   |
|                                                |                                                                                    | -/- : S1 vs S2   | 29.92          | -13.96 to 73.81    | P=0.3552, ns   |
|                                                |                                                                                    | S2: +/+ vs +/-   | 41.46          | -1.640 to 84.55    | P=0.0662, ns   |
|                                                |                                                                                    | S2: +/+ vs -/-   | 52.3           | 9.207 to 95.40     | P=0.0085, **   |
|                                                |                                                                                    |                  |                |                    |                |
|                                                | Preference;<br>Ordinary one-way<br>ANOVA;<br>Dunnnett's.<br>comparison test        | +/+ vs +/-       | 52.51          | 12.99 to 92.02     | P=0.0079, **   |
|                                                |                                                                                    | +/+ vs -/-       | 69.12          | 29.60 to 108.6     | P=0.0005, ***  |
| Fig. 1B<br>3C_novelty<br>preference;<br>Female | Interaction time;<br>Two-way<br>ANOVA; Tukey's<br>HSD multiple<br>comparison test  | +/+ : S1 vs S2   | 105.6          | 42.73 to 168.4     | P<0.0001, **** |
|                                                |                                                                                    | +/- : S1 vs S2   | 107.6          | 50.56 to 164.6     | P<0.0001, **** |
|                                                |                                                                                    | -/- : S1 vs S2   | 80.04          | 15.70 to 144.4     | P=0.0063, **   |
|                                                | Preference;<br>Ordinary one-way<br>ANOVA;<br>Dunnnett's.<br>comparison test        | +/+ vs +/-       | -15.89         | -64.84 to 33.06    | P=0.6792, ns   |
|                                                |                                                                                    | +/+ vs -/-       | 15.19          | -39.46 to 69.85    | P=0.7503, ns   |
|                                                |                                                                                    |                  |                |                    |                |
| Fig. 1C<br>3C_sociability;<br>Male             | Interaction time;<br>Two-way<br>ANOVA; Tukey's<br>HSD multiple<br>comparison test  | +/+ : S1 vs O    | 225.5          | 189.9 to 261.1     | P<0.0001, **** |
|                                                |                                                                                    | M120l: S1 vs O   | 81.53          | 45.93 to 117.1     | P<0.0001, **** |
|                                                |                                                                                    | S1: +/+ vs M120l | 121.5          | 85.93 to 157.1     | P<0.0001, **** |
|                                                | Unpaired t test                                                                    | +/+ vs M120l     | Two-tailed     | t=8.340, df=28     | P<0.0001, **** |
| Fig. 1C<br>3C_sociability;<br>female           | Preference; Two-<br>way ANOVA;<br>Tukey's HSD<br>multiple<br>comparison test       | +/+ : S1 vs O    | 189.7          | 149.3 to 230.1     | P<0.0001, **** |
|                                                |                                                                                    | M120l: S1 vs O   | 177.9          | 136.0 to 219.8     | P<0.0001, **** |
|                                                | Unpaired t test                                                                    | +/+ vs M120l     | Two-tailed     | t=0.4220, df=25    | P=0.677, ns    |
| Fig. 1C<br>3C_novelty<br>preference; Male      | Interaction time;<br>Two-way<br>ANOVA; Tukey's<br>HSD multiple<br>comparison test  | +/+ : S1 vs S2   | 143.2          | 98.24 to 188.2     | P<0.0001, **** |
|                                                |                                                                                    | M120l: S1 vs S2  | 22.53          | -22.42 to 67.49    | P=0.55, ns     |
|                                                |                                                                                    | S2: +/+ vs M120l | 103.8          | 58.84 to 148.8     | P<0.0001, **** |
|                                                | Unpaired t test                                                                    | +/+ vs M120l     | Two-tailed     | t=7.978, df=28     | P<0.0001, **** |
| Fig. 1C<br>3C_novelty<br>preference;<br>Female | Preference; Two-<br>way ANOVA;<br>Tukey's HSD<br>multiple<br>comparison test       | +/+ : S1 vs S2   | 121.9          | 83.74 to 160.0     | P<0.0001, **** |
|                                                |                                                                                    | M120l: S1 vs S2  | 119.9          | 80.37 to 159.5     | P<0.0001, **** |



|                          |                                                    |                      |            |                  |                |
|--------------------------|----------------------------------------------------|----------------------|------------|------------------|----------------|
|                          | Unpaired t test                                    | +/+ vs M120I         | Two-tailed | t=0.08710, df=25 | P=0.9313, ns   |
| Fig. 1D.<br>RSI; Male    | Ordinary one-way ANOVA; Dunnett's. comparison test | +/+ vs +/-           | 40.92      | 1.489 to 80.36   | P=0.0411, *    |
|                          |                                                    | +/+ vs -/-           | 65.85      | 26.41 to 105.3   | P=0.0009, ***  |
|                          | Unpaired t test                                    | +/+ vs M120I         | Two-tailed | t=5.645, df=28   | P<0.0001, **** |
| Fig. 1D.<br>RSI; Female  | Ordinary one-way ANOVA; Dunnett's. comparison test | +/+ vs +/-           | 18.24      | -11.02 to 47.51  | P=0.2717, ns   |
|                          |                                                    | +/+ vs -/-           | -15.65     | -48.32 to 17.02  | P=0.4469, ns   |
|                          | Unpaired t test                                    | +/+ vs M120I         | Two-tailed | t=0.4106, df=25  | P=0.6849, ns   |
| Fig. 3B<br>Male          | Unpaired t test                                    | ACAAd, Ctrl vs hM3Dq | Two-tailed | t=0.04856, df=7  | P=0.96, ns     |
|                          |                                                    | PL, Ctrl vs hM3Dq    | Two-tailed | t=1.153, df=7    | P=0.2867, ns   |
|                          |                                                    | ILA, Ctrl vs hM3Dq   | Two-tailed | t=4.063, df=8    | P=0.0036, **   |
| Fig. 3C.<br>Male         | Paired t test                                      | C21- vs C21+         | Two-tailed | t=0.8659, df=8   | P=0.4118, ns   |
|                          | Paired t test                                      | C21- vs C21+         | Two-tailed | t=8.879, df=11   | P<0.0001, **** |
|                          | Unpaired t test                                    | Ctrl vs hM3Dq        | Two-tailed | t=6.984, df=19   | P<0.0001, **** |
|                          | Unpaired t test                                    | Ctrl vs hM3Dq        | Two-tailed | t=7.521, df=19   | P<0.0001, **** |
| Fig. 3D<br>Male          | Paired t test                                      | C21- vs C21+         | Two-tailed | t=2.806, df=9    | P=0.0205, *    |
|                          | Paired t test                                      | C21- vs C21+         | Two-tailed | t=1.180, df=10   | P=0.2652, ns   |
|                          | Unpaired t test                                    | Ctrl vs hM3Dq        | Two-tailed | t=0.2972, df=19  | P=0.7695, ns   |
|                          | Unpaired t test                                    | Ctrl vs hM3Dq        | Two-tailed | t=0.2031, df=19  | P=0.8412, ns   |
| Fig. 3E.<br>Female       | Paired t test                                      | C21- vs C21+         | Two-tailed | t=2.751, df=10   | P=0.0205, *    |
|                          | Paired t test                                      | C21- vs C21+         | Two-tailed | t=11.68, df=14   | P<0.0001, **** |
|                          | Unpaired t test                                    | Ctrl vs hM4Di        | Two-tailed | t=7.617, df=24   | P<0.0001, **** |
|                          | Unpaired t test                                    | Ctrl vs hM4Di        | Two-tailed | t=4.813, df=24   | P<0.0001, **** |
| Fig. 3F<br>Female        | Paired t test                                      | C21- vs C21+         | Two-tailed | t=2.310, df=11   | P=0.0413, *    |
|                          | Paired t test                                      | C21- vs C21+         | Two-tailed | t=11.96, df=10   | P<0.0001, **** |
|                          | Unpaired t test                                    | Ctrl vs hM4Di        | Two-tailed | t=7.779, df=21   | P<0.0001, **** |
|                          | Unpaired t test                                    | Ctrl vs hM4Di        | Two-tailed | t=9.233, df=21   | P<0.0001, **** |
| Fig. 3G.<br>Male         | Unpaired t test                                    | LSr                  | Two-tailed | t=1.370, df=8    | P=0.2080, ns   |
|                          |                                                    | MS                   | Two-tailed | t=1.310, df=8    | P=0.2266, ns   |
|                          |                                                    | BSTam                | Two-tailed | t=2.386, df=8    | P=0.0442, *    |
|                          |                                                    | DGd                  | Two-tailed | t=3.513, df=8    | P=0.0079, **   |
|                          |                                                    | LA                   | Two-tailed | t=1.495, df=8    | P=0.1734, ns   |
|                          |                                                    | BLAa                 | Two-tailed | t=2.933, df=8    | P=0.0189, *    |
|                          |                                                    | LH                   | Two-tailed | t=1.335, df=8    | P=0.2185, ns   |
|                          |                                                    | VTA                  | Two-tailed | t=3.871, df=8    | P=0.0047, **   |
| Fig. 4G<br>Male_SHANK2   | Unpaired t test                                    | WT vs M120I          | Two-tailed | t=3.397, df=9    | P=0.0079, **   |
| Fig. 4G<br>Female_SHANK2 |                                                    | WT vs M120I          | Two-tailed | t=0.2362, df=10  | P=0.8181, ns   |
| Fig. 4G<br>Male_SYNPO    |                                                    | WT vs M120I          | Two-tailed | t=2.236, df=11   | P=0.0470, *    |
| Fig. 4G<br>Female_SYNPO  |                                                    | WT vs M120I          | Two-tailed | t=1.067, df=12   | P=0.3069, ns   |
| Fig. 4G<br>Male_PSD-95   |                                                    | WT vs M120I          | Two-tailed | t=6.040, df=11   | P<0.0001, **** |

|                          |                                                     |                      |            |                      |                |
|--------------------------|-----------------------------------------------------|----------------------|------------|----------------------|----------------|
| Fig. 4G<br>Female_PSD-95 |                                                     | WT vs M120I          | Two-tailed | t=0.2810, df=12      | P=0.7835, ns   |
| Fig. 4H<br>Male_RRAGC    |                                                     | WT vs M120I          | Two-tailed | t=0.3015, df=9       | P=0.7699, ns   |
| Fig. 4H<br>Female_RRAGC  |                                                     | WT vs M120I          | Two-tailed | t=2.649, df=10       | P=0.0244, *    |
| Fig. 4H<br>Male_TIPRL    |                                                     | WT vs M120I          | Two-tailed | t=1.892, df=12       | P=0.0829, ns   |
| Fig. 4H<br>Female_TIPRL  |                                                     | WT vs M120I          | Two-tailed | t=2.287, df=11       | P=0.043, *     |
| Fig. 4I<br>Female_p-mTOR |                                                     | WT vs M120I          | Two-tailed | t=3.083, df=10       | P=0.0116, *    |
| Fig. 5B Male             | Unpaired t test                                     | P-mTOR/mTOR water    | Two-tailed | t=3.965, df=6        | P=0.0074, **   |
|                          |                                                     | P-mTOR/mTOR BCAA     | Two-tailed | t=2.881, df=6        | P=0.028, *     |
|                          |                                                     | P-S6K/S6K water      | Two-tailed | t=2.741, df=6        | P=0.0337, *    |
|                          |                                                     | P-S6K/S6K BCAA       | Two-tailed | t=2.724, df=6        | P=0.0345, *    |
|                          |                                                     | 4EBP/HSP90 water     | Two-tailed | t=0.3334, df=6       | P=0.7502, ns   |
|                          |                                                     | 4EBP/HSP90 BCAA      | Two-tailed | t=0.1705, df=6       | P=0.8702, ns   |
| Fig. 5C Male             | Two-way ANOVA; Tukey's HSD multiple comparison test | WT: BCAA-/BCAA+      | 0.6868     | -0.9502 to 2.324     | P=0.6951, ns   |
|                          |                                                     | BCAA-: WT vs M120I   | 5.16       | 3.464 to 6.856       | P<0.0001, **** |
|                          |                                                     | M120I: BCAA-/BCAA+   | -6.569     | -8.423 to -4.714     | P<0.0001, **** |
|                          |                                                     | BCAA + : WT vs M120I | -2.096     | -3.897 to -0.2947    | P=0.0155, *    |
|                          | Two-way ANOVA; Tukey's HSD multiple comparison test | WT: BCAA-/BCAA+      | -0.001712  | -0.02572 to 0.02230  | P=0.998, ns    |
|                          |                                                     | BCAA-: WT vs M120I   | 0.08229    | 0.05742 to 0.1072    | P<0.0001, **** |
|                          |                                                     | M120I: BCAA-/BCAA+   | -0.06098   | -0.08818 to -0.03378 | P<0.0001, **** |
|                          |                                                     | BCAA + : WT vs M120I | 0.02303    | -0.003391 to 0.04944 | P=0.1108, ns   |
|                          | Two-way ANOVA; Tukey's HSD multiple comparison test | WT: BCAA-/BCAA+      | -0.06752   | -0.1377 to 0.002625  | P=0.0638, ns   |
|                          |                                                     | BCAA-: WT vs M120I   | 0.1339     | 0.06120 to 0.2065    | P<0.0001, **** |
|                          |                                                     | M120I: BCAA-/BCAA+   | -0.1543    | -0.2337 to -0.07479  | P<0.0001, **** |
|                          |                                                     | BCAA + : WT vs M120I | 0.04712    | -0.03005 to 0.1243   | P=0.3883, ns   |
| Fig. 5D Male             | Two-way ANOVA; Tukey's HSD multiple comparison test | WT: BCAA-/BCAA+      | -19.37     | -41.37 to 2.618      | P=0.1027, ns   |
|                          |                                                     | BCAA-: WT vs M120I   | 80.43      | 59.57 to 101.3       | P<0.0001, **** |
|                          |                                                     | M120I: BCAA-/BCAA+   | -94.71     | -116.0 to -73.47     | P<0.0001, **** |
|                          |                                                     | BCAA + : WT vs M120I | 5.093      | -17.26 to 27.45      | P=0.9304, ns   |
| Fig. 5E Male             | Unpaired t test                                     | WT vs M120I          | Two-tailed | t=5.124, df=6        | P=0.0022, **   |
|                          |                                                     | WT vs M120I          | Two-tailed | t=0.05818, df=6      | P=0.9555, ns   |
| Fig. 5F Male             | Paired t test                                       | BCAA- vs BCAA+       | Two-tailed | t=4.121, df=7        | P=0.0045, **   |

|                                                         |                                                                                    |             |            |                  |                |
|---------------------------------------------------------|------------------------------------------------------------------------------------|-------------|------------|------------------|----------------|
| Fig. 6B 150 ppm<br>3C_sociability,<br>Male              | Interaction times;<br>Two-way<br>ANOVA; Tukey's<br>HSD multiple<br>comparison test | SI vs O     | 194.3      | 159.7 to 228.9   | P<0.0001, **** |
|                                                         |                                                                                    | SI vs O     | 175.2      | 144.8 to 205.6   | P<0.0001, **** |
|                                                         | Unpaired t test                                                                    | WT vs M120I | Two-tailed | t=0.8415, df=21  | P=0.4095, ns   |
| Fig. 6B 150 ppm<br>3C_novelty<br>preference, Male       | Interaction time;<br>Two-way<br>ANOVA; Tukey's<br>HSD multiple<br>comparison test  | SI vs S2    | 129        | 77.01 to 181.0   | P<0.0001, **** |
|                                                         |                                                                                    | SI vs S2    | 89.08      | 43.48 to 134.7   | P<0.0001, **** |
|                                                         | Unpaired t test                                                                    | WT vs M120I | Two-tailed | t=1.381, df=21   | P=0.1819, ns   |
| Fig. 6B 150 ppm<br>RSI, Male                            | Unpaired t test                                                                    | WT vs M120I | Two-tailed | t=2.380, df=21   | P=0.0269, *    |
| Fig. 6B 150 ppm,<br>3C_sociability,<br>Female           | Two-way<br>ANOVA; Tukey's<br>HSD multiple<br>comparison test                       | SI vs O     | 188.5      | 150.7 to 226.3   | P<0.0001, **** |
|                                                         |                                                                                    | SI vs O     | 187.1      | 149.3 to 224.9   | P<0.0001, **** |
|                                                         | Unpaired t test                                                                    | WT vs M120I | Two-tailed | t=0.07192, df=18 | P=0.9435, ns   |
| Fig. 6B 150 ppm,<br>3C_novelty<br>preference,<br>Female | Two-way<br>ANOVA; Tukey's<br>HSD multiple<br>comparison test                       | SI vs S2    | 102.1      | 60.76 to 143.4   | P<0.0001, **** |
|                                                         |                                                                                    | SI vs S2    | 86.7       | 45.36 to 128.0   | P<0.0001, **** |
|                                                         | Unpaired t test                                                                    | WT vs M120I | Two-tailed | t=0.8270, df=18  | P=0.4191, ns   |
| Fig. 6B 150 ppm,<br>RSI, Female                         | Unpaired t test                                                                    | WT vs M120I | Two-tailed | t=0.5314, df=18  | P=0.6016, ns   |
| Fig. 6C 30 ppm,<br>3C_sociability,<br>male              | Two-way<br>ANOVA; Tukey's<br>HSD multiple<br>comparison test                       | SI vs O     | 194.3      | 150.6 to 237.9   | P<0.0001, **** |
|                                                         |                                                                                    | SI vs O     | 61.85      | 21.71 to 102.0   | P=0.0009, ***  |
|                                                         | Unpaired t test                                                                    | WT vs M120I | Two-tailed | t=6.562, df=22   | P<0.0001, **** |
| Fig. 6C 30 ppm,<br>3C_novelty<br>preference, male       | Two-way<br>ANOVA; Tukey's<br>HSD multiple<br>comparison test                       | SI vs S2    | 106        | 57.41 to 154.6   | P<0.0001, **** |
|                                                         |                                                                                    | SI vs S2    | 4.462      | -40.24 to 49.16  | P=0.9933, ns   |
|                                                         | Unpaired t test                                                                    | WT vs M120I | Two-tailed | t=6.913, df=22   | P<0.0001, **** |
| Fig. 6C 30 ppm,<br>RSI, male                            | Unpaired t test                                                                    | WT vs M120I | Two-tailed | t=4.901, df=22   | P<0.0001, **** |
| Fig. 6C 30 ppm,<br>3C_sociability,<br>Female            | Two-way<br>ANOVA; Tukey's<br>HSD multiple<br>comparison test                       | SI vs O     | 177.1      | 134.5 to 219.7   | P<0.0001, **** |
|                                                         |                                                                                    | SI vs O     | 207        | 164.4 to 249.6   | P<0.0001, **** |
|                                                         | Unpaired t test                                                                    | WT vs M120I | Two-tailed | t=1.331, df=20   | P=0.1981, ns   |
| Fig. 6C 30 ppm<br>3C_novelty<br>preference,<br>Female   | Two-way<br>ANOVA; Tukey's<br>HSD multiple<br>comparison test                       | SI vs S2    | 98.09      | 54.00 to 142.2   | P<0.0001, **** |
|                                                         |                                                                                    | SI vs S2    | 94.18      | 50.09 to 138.3   | P<0.0001, **** |
|                                                         | Unpaired t test                                                                    | WT vs M120I | Two-tailed | t=0.1911, df=20  | P=0.8504, ns   |
| Fig. 6C 30 ppm,<br>RSI, Female                          | Unpaired t test                                                                    | WT vs M120I | Two-tailed | t=0.4271, df=20  | P=0.6738, ns   |
